# Supplementary material for: Post-metamorphic skeletal growth in the sea urchin Paracentrotus lividus and implications for body plan evolution
Source: PubMed Central journal article supplement (PMC7968366; doi:10.1186/s13227-021-00174-1), 2021-03-16
Supplement: 13227_2021_174_MOESM1_ESM.pdf [file 13227_2021_174_MOESM1_ESM.pdf]

**Supplemental Information from:**

**Post-metamorphic skeletal growth in the sea urchin *Paracentrotus lividus* and implications for body plan evolution**

**Jeffrey R. Thompson<sup>1,2\*</sup>, Periklis Paganos<sup>3</sup>, Giovanna Benvenuto<sup>3</sup>, Maria Ina Arnone<sup>3</sup>, Paola Oliveri<sup>1,2\*</sup>**

\*Corresponding Authors: jeff.thompson@ucl.ac.uk, p.oliveri@ucl.ac.uk

<sup>1</sup>Department of Genetics, Evolution and Environment, University College London, Darwin Building, Gower Street, London WC1E 6BT, United Kingdom

<sup>2</sup>UCL Center for Life's Origins and Evolution

<sup>3</sup>Stazione Zoologica Anton Dohrn, Villa Comunale, 80121 Naples, Italy

Key Words: echinoid, skeleton, development

## **Supplemental Materials and Methods**

### **(a) Culturing**

The initial cultures were concentrated at approximately 10 larvae/ml. During the culturing period larvae were then diluted to an approximate final concentration of 1 larva/2ml in a large beaker. They were fed three times a week using a dropper with 70% *Isocrysis*, 30% *Dunaliella tertiolecta* and aquarium grade fatty acids (Snow Reef, SHG). The total number of algal cells used varied from 5,000-20,000/ml according to larval needs following microscopic observation of the stomach contents. The water was changed twice a week and larvae were kept at 18°C. In these conditions, the larvae became competent in approximately 3.5 weeks. Competent larvae metamorphosed onto the sides of the beaker in which they were cultured, or onto small, glass cover slips which were added to the beaker two to three days prior to metamorphosis.

### **(b) Immunohistochemistry**

Juvenile and late stage *P. lividus* larvae were fixed in 4% paraformaldehyde (PFA) for 15 minutes. Individuals were then treated with ice cold methanol (MeOH) for one minute, and washed four to five times in 1X Phosphate Buffered Saline with 0.1% Tween (PBST). Most washes were for ~5 minutes in 200 µl. Samples were then stored in blocking buffer (BB; PBST with 4% goat or sheep serum and 1% BSA) at 4°C, either overnight or for up to four months prior to incubation with primary antibodies. Samples were incubated with combinations of primary antibodies for 1.5 hours at 37°C, or overnight at 4°C, depending upon the primary antibody. Primary antibody type and dilutions are shown in Supplemental Table 1. Samples were then washed 4 to 5 times with PBST, and incubated with anti-rabbit, anti-rat and/or anti-mouse secondary antibodies (Thermo Fischer Scientific) conjugated with Alexa fluorophores (Supp. Table 1) for one hour using a dilution of 1/1000. Following removal of secondary antibodies, each sample was washed 4 to 5 times with PBST before addition of DAPI at a dilution of 1:10000 (of a stock solution of 5 mg/ml), for at least 15 minutes. To preserve skeleton intact, samples were intentionally not decalcified.

### **(c) Calcein staining**

In order to visualize newly deposited CaCO<sub>3</sub> of the skeleton, live animals were incubated with Calcein (Sigma) at a dilution of 1:50 of a stock solution of 1.25 mg/ml in sea water. Calcein is light-sensitive, so incubation took place in the dark. Incubation took place in 4 ml wells with a coverslip placed at the bottom of each well. After 24 hours of incubation, calcein was washed out six times with fresh sea water. To understand the spatial incorporation of calcein relative to additional skeletal growth, pulse-chase experiments were carried out following incubation. 0-hours chase animals were fixed immediately following calcein wash out and fixed following protocols for immunostaining up to the BB step and stored at 4°C in the dark. 24- and 48-hours chase animals were reared in sea water in the dark prior to fixation and storage in BB in the dark at 4°C. Following fixation, immunostaining against skeletogenic proteins was carried out as described above, except that all steps were carried out in the dark. Specimens were imaged using a Zeiss LSM 700 confocal microscope.

### **(d) Assays of cell proliferation**

To understand the spatial distribution and quantity of proliferating cells during juvenile sea urchin growth assays of cell proliferation were carried out using the Click-iT® EdU Alexa Flour® 555HCS and (Life Technologies) and Click-iT™ EdU Cell Proliferation Kit for Imaging

Alexa Flour<sup>TM</sup> 647 (Thermo Fisher Scientific). J2 animals were incubated with EdU in 7 ml wells at a dilution of 1:1000 (5  $\mu$ M) in sea water for six hours. J5 and J6 animals were incubated with Edu for 63 hours. Edu was washed out six times following incubation, and 0-hours chase animals were immediately fixed in 4% PFA for 15 minutes, while 24- and 48 hours chase animals were further reared in wells until fixation. After fixation, samples were washed twice with PBST, and permeabilized in PBST+Triton for 30 minutes. They were then washed twice in PBST, permeabilized in MEOH for 1 minute, and washed a further two times before storage in BB overnight at 4°C. Primary and secondary antibody incubations were carried out as described above, and following the PBST washes after secondary antibody incubation, samples were incubated in 50  $\mu$ l of the Click-iT<sup>®</sup> Reaction cocktail, following the manufacturer's instructions for 30 minutes. Samples were then washed with 50  $\mu$ l of Click-iT<sup>®</sup> reaction Rinse Buffer for 30 minutes, before two washes in PBST, and addition of DAPI at a dilution of 1:10000 (of a stock solution of 5 mg/ml). Specimens were imaged using a Zeiss LSM 700 confocal microscope. For each image, five circles of identical size were used to define regions of interest (ROIs) on each image. The relative position of the circles on each image was not standard with respect to the image, thus resulting in a semi-random placement of each circle. This was done intentionally so as to not bias which portion of the animal surfaces were counted. EdU<sup>+</sup> and DAPI<sup>+</sup> nuclei were quantified in ImageJ by first converting images to 16-bit, then thresholding. Images were then converted to binary images using Process  $\rightarrow$  Binary, and then Process  $\rightarrow$  Binary  $\rightarrow$  Watershed. Finally cells within the ROIs were counted using Analyze  $\rightarrow$  Analyze Particles. This is summarized in Supplemental Figure 11. The ratio of EdU<sup>+</sup> to DAPI<sup>+</sup> stained nuclei was then counted for each image, and the ratios for the aboral and oral surfaces of each quantified individual were compared using a Mann-Whitney *U* test. R code to repeat analyses and plotting are in Supplemental File 1.

## Supplemental Data

### (1) Staging Scheme

In order to make standardized comparisons across cultures and asynchronously developing individuals, we devised a staging scheme based off the presence and absence of specific morphological characters during the course of post-metamorphic development. Our staging scheme does not cover the most immediate stages of post-metamorphic growth, and for an account of those stages we refer the reader to Gosselin and Jangoux [1]

- (i) Stage Juvenile 1 (J1) —The earliest of our stages, J1 corresponds to approximately 1-3 days post-metamorphosis. At this stage, the post-metamorphic juvenile is readily characterized by the primary podia, and the interambulacral primary spines. There are four interambulacral spines in each interambulacral area, one on each interambulacral plate. Ambulacral regions are dominated by the primary podia, and two poorly developed secondary podia are present in each ambulacral area. The primary podia have well-formed disks and rosettes, while the secondary podia lack disks, and have not yet formed rosettes. There are two small ambulacral plates in each ambulacrum, and there are ten peristomial plates arranged inter-radially adoral to each interambulacrum. When viewed adorally, the five ocular plates, five genital plates, and an anal plate are visible, and two juveniles spines (or multifid spines of Gosselin and Jangoux [1]) are present on each ocular plate. The ocular plates each bear a ledge, which extends slightly over

- top of the primary podia. Between one and two pedicellariae are present on two of the genital plates, and at least one juvenile spine is present on each genital plate. The plates of the periproct and genital plates do not appear well-sutured together.
- (ii) Stage Juvenile 2 (J2) —J2 animals correspond to approximately 4-7 days post-metamorphosis. This stage shows the additional growth on the oral surface relative to J1 individuals, and is primarily differentiated based upon the presence of five peristomial tube feet, and the development of disks and rosettes in the secondary podia of each ambulacrum. There are still four primary spines and interambulacral plates present in each interambulacrum. Ambulacral areas are still dominated by the primary podia, though secondary podia are much larger, about the same size as the primary podia. Secondary podia have well-developed disks and growing skeletal rosettes. Small, peristomial podia are present protruding through five of the peristomial plates. Ocular plates still bear two juvenile spines, and there are between one and two pedicellariae on two genital plates. Genital plates do not appear well-sutured.
- (iii) Stage Juvenile 3 (J3) —J3 stage animals are roughly 7-10 days post-metamorphosis. They are most readily characterized by the presence of newly added sphaeridia, spine-like sensory structures present along one of the most oral ambulacral plates in each ambulacrum. All plates of the test have grown larger at their margins, and interambulacral areas bear four plates and primary spines. Ambulacral plates have grown to abut one another and the interambulacral plates and a clear circular margin has formed around the peristome. The secondary podia bear well-developed disks and rosettes, and are about the same size as, and may appear larger than, the primary podia. Spine-like, elongate sphaeridia have started to grow towards the perradial margin of one ambulacral plate in each ambulacrum, but they lack the large bulb present in later stages. Peristomial podia have developed small disks. On the aboral surface, the genital and ocular plates have started to fuse via plate accretion, and the anal plate has grown larger and more distinct. The number of juvenile spines and pedicellariae remains unchanged from earlier stages.
- (iv) Stage Juvenile 4 (J4) — Stage J4 animals are approximately 8-12 days post-metamorphosis. They are differentiated from Stage J3 animals by having a well-developed bulb at the tip of sphaeridia, and by having begun to add a second row of secondary podia. Interambulacra consist of four plates, each with a primary spine. Ambulacra are dominated by secondary podia and sphaeridia. Sphaeridia are elongate and with a well-developed bulb at their tip. Aboral surface shows well-sutured genital and ocular plates.
- (v) Stage Juvenile 5 (J5) —Stage J5 animals are substantially older than earlier stages, being approximately 2.5-3.5 weeks post-metamorphosis. This gap in timing is reflected by the addition of numerous novel morphological structures relative to earlier stage animals. In J5 animals, the aboral surface is relatively smaller than the oral surface, and all new growth has taken place in axial tissues. There are still four interambulacral plates and primary spines in each interambulacral area, but interambulacral pedicellariae have been added to the most aboral interambulacral plate in each area. Ambulacral areas have well-developed, bulbous and glossy pedicellariae, and primary podia are no longer

visible, presumably having been lost during the course of growth. There are two well-developed rows of secondary podia in each ambulacral area, with each podium bearing a disk and rosette. One or two secondary podia of the third row are growing adjacent to the ocular plate, but have yet to develop disks.

Immediately aboral of the ocular plate, ambulacral areas are dominated by a large ambulacral primary spine. In the extraxial tissues on the aboral surface, very little growth has taken place. Juvenile spines are still present on the aboral surface, but they are not easily visible. By J5, juveniles have also opened their mouths.

- (vi) Stage Juvenile 6 (J6) —The final stage in our scheme, J6, corresponds to roughly 3-4 weeks post-metamorphosis. J6 animals are the most morphologically complex stage, being characterized primarily by the addition of interambulacral and ambulacral primary spines, as well as the addition of ambulacral pedicellariae adoral to the ambulacral primary spines. There are four or five interambulacral plates in J6 animals, however, the plate surfaces have grown, and new interambulacral primary spines have been added to the adapical most interambulacral plates in each area. There are thus five or six interambulacral primary spines in each interambulacrum. As in J5 animals, a single pedicellariae is also present in each interambulacral area. Pedicellariae have also formed on a single ambulacral plates adoral to the largest ambulacral primary spines (which was added in J5 animals) in some of the ambulacra. Well-developed sphaeridia are present in each ambulacrum. Like J5 animals, J6 animals have no primary podia, and their adoral ambualcra are dominated by ambulacral primary spines. There are two ambulacral primary spines in each ambulacrum. There are three well-developed rows of secondary podia in each ambulacrum, and the podia of a fourth row are growing. Like J5 animals, no growth of new structures is taking place in the extraxial tissues of the aboral surface.

## Supplemental Figures

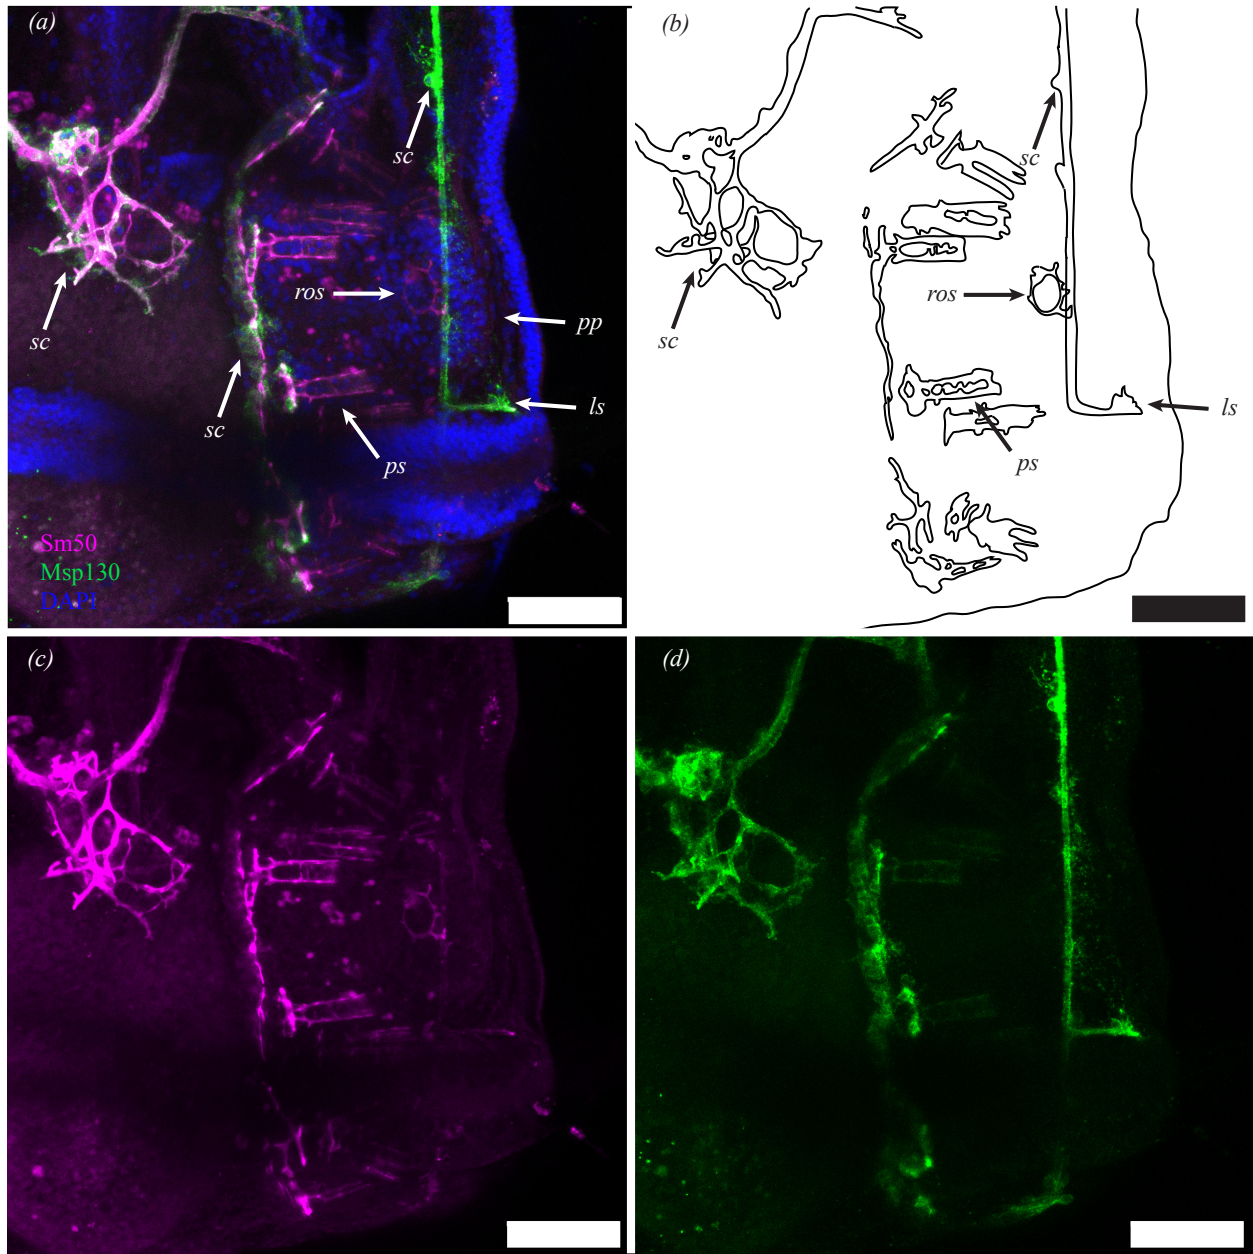

**Fig. S1 Confocal images of pre-metamorphosis, late stage *P. lividus* larvae.** Shows developing adult body plan within the rudiment stained for Msp130 using monoclonal antibody 6a9 (green), and Sm50 using an anti-Sm50 antibody (magenta). (a) Merged image of Sm50 and Msp130 and nuclear staining (DAPI, blue) showing developing skeletal tissues, within rudiment including spines, tubercles, and the rosette of a primary podium. DAPI (blue) Msp130 strongly labels the bodies and projections of cells tightly associated with the skeleton (skeletogenic cells), and the skeleton. Conversely, staining for Sm50 is stronger in the skeleton itself, and in structures such as the spines and rosette. (b) Interpretive drawing showing morphology

corresponding to (a). (c) Magenta channel showing staining for Sm50. Stronger staining of Sm50 is identified at the base of the spines and rosette, where deposition of skeletal tissue is active. In contrast, the larval skeleton is not strongly labeled. (d) Green channel showing staining for Msp130 using monoclonal antibody 6a9. Note the strong staining in the larval skeleton, and the staining of the skeletogenic cells. sc, skeletogenic cells; ls, Larval skeleton; pp, primary podium; ros, rosette. Scale bar is 50  $\mu$ m.

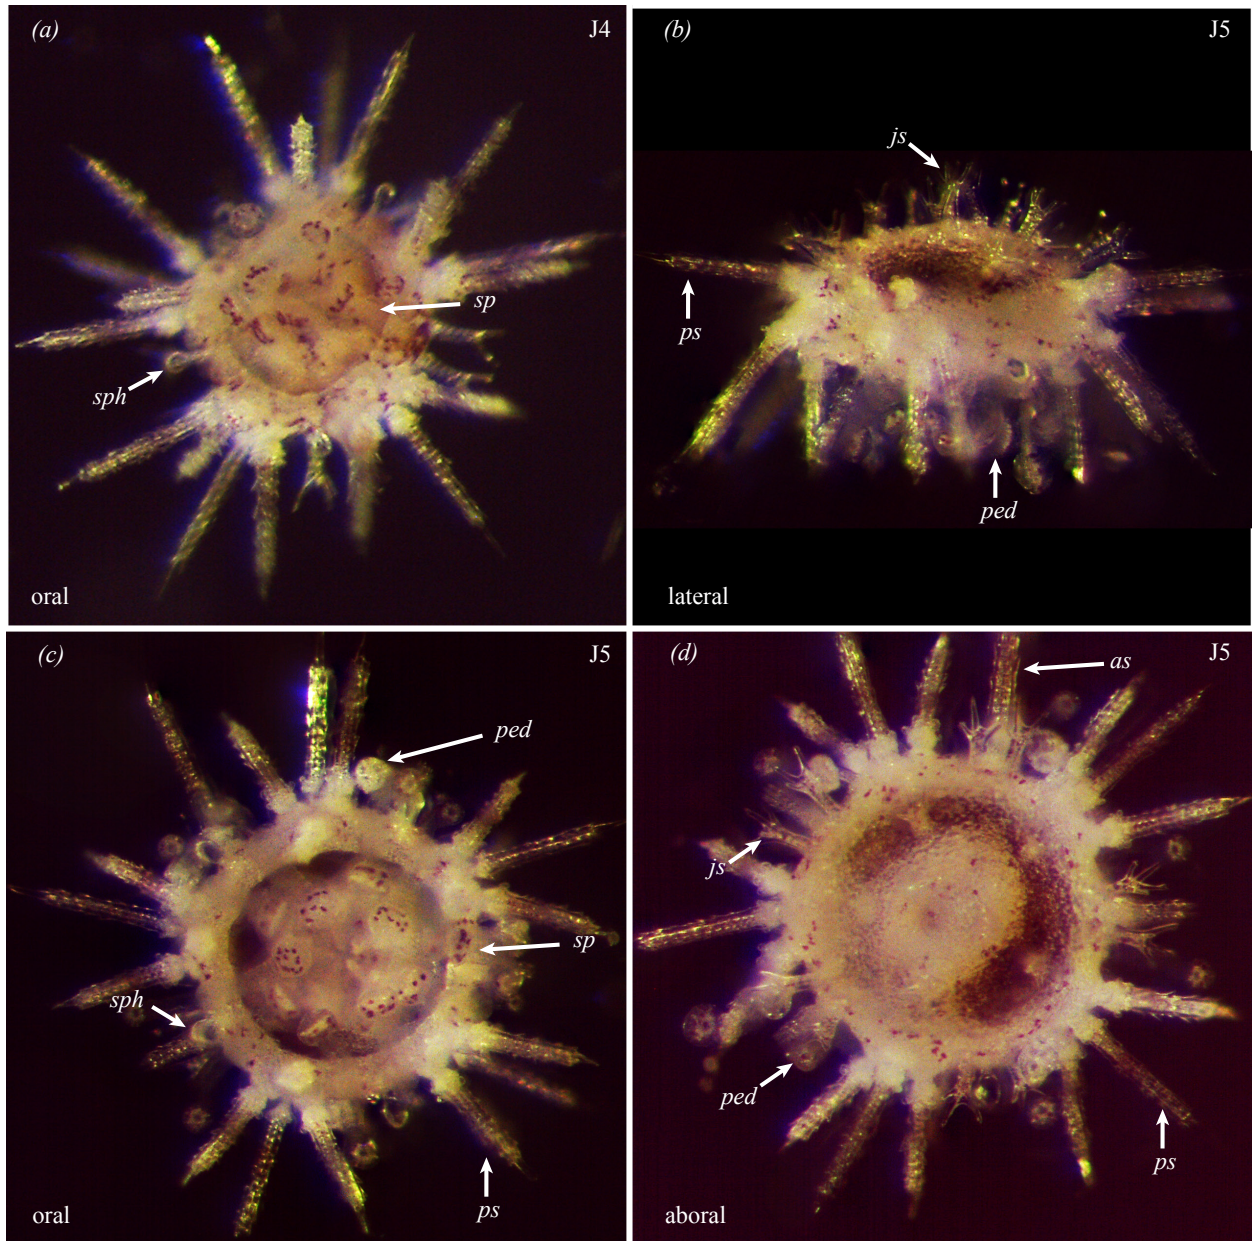

**Fig. S2. Post-metamorphic *P. lividus* juveniles.** Light microscope images showing post-metamorphic juvenile *P. lividus*. (a) Oral view of stage J4 juvenile. Sphaeridium is well developed and oral surface is dominated by tube feet. Pigmented cells are abundant in the distal disk of the tube feet. (b) Lateral view of J5 animal. Animal is oblong in lateral view, and the aboral surface bears far fewer structures than the oral surface. (c) Oral view of same animal as (b). Note well-developed, circular peristomial margin. Pedicellariae are present on interambulacral plates, and well-developed, glossy sphaeridia are present on ambulacral plates in addition to ambulacral spines. (d) Aboral surface as same animal in (b)-(c). The aboral surface bears few structures, except for the juvenile spines present on genital and ocular plates. Darkened crescent is the gut, visible inside of the animal. sp, secondary podia; sph, sphaeridia; ps, primary interambulacral spine; js, juvenile spine; ped, pedicellariae; as, ambulacral spine.



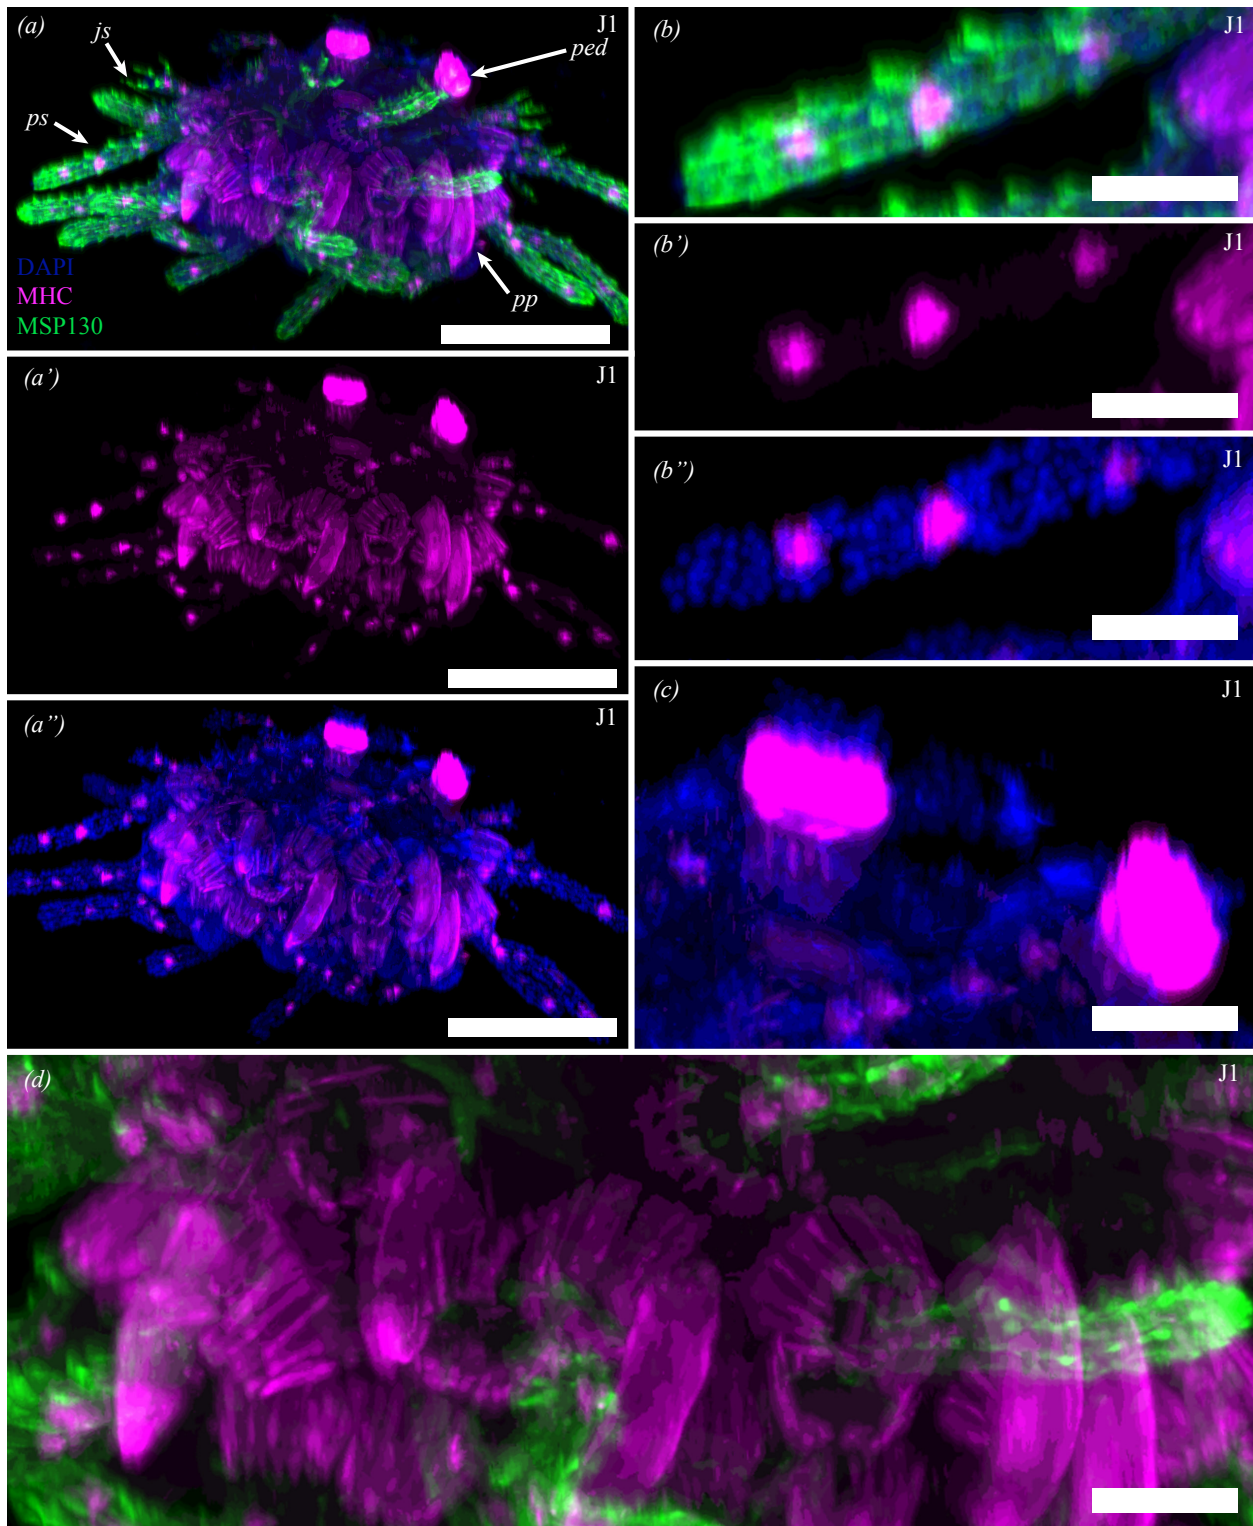

**Fig. S3. Skeleton and Musculature of *P. lividus* juveniles.** Light sheet microscope images showing staining in J1 individual for Myosin Heavy Chain (MHC) using an anti-MHC antibody and Msp130 using monoclonal antibody 6a9. (a) Lateral view showing staining for MHC (Magenta), Msp130 (Green), and nuclei using DAPI (Blue). Msp130 strongly stains the interambulacral primary spines and the juvenile spines, while MHC is localized in the muscular

tissue of the primary podia, in longitudinal bands surrounding the tubercles, in bundles within the spines, and in the bases of the pedicellariae valves. (a') Magenta channel from (a) showing only MHC. (a'') Magenta and blue channels showing MHC and DAPI. Staining for MHC is strongest in the bases of the pedicellariae valves. (b) Close up of primary interambulacral spine showing bundles of MHC<sup>+</sup> cells within the lumen of skeletal spines. (b') Magenta channel from (b), showing bundles of MHC<sup>+</sup> cells. This image is the same as Figure 2b in the main text. (b'') Bundles of MHC<sup>+</sup> cells relative to DAPI staining, indicating that each MHC<sup>+</sup> circle stains multiple cells as opposed to a single cell. (c) Enlargement of pedicellarial staining. The most intense staining for MHC in the animal is the base of the pedicellariae pincers (valves). (d) Close up from (a) with only magenta and green channels showing longitudinal bands of MHC<sup>+</sup> cells surrounding the tubercles of primary interambulacral spines and muscles along the primary podia. ps, primary interambulacral spine; js, juvenile spine; pp, primary podia; ped, pedicellariae. Scale bars in (a)-(a'') are 100  $\mu\text{m}$ , rest are 25  $\mu\text{m}$ .

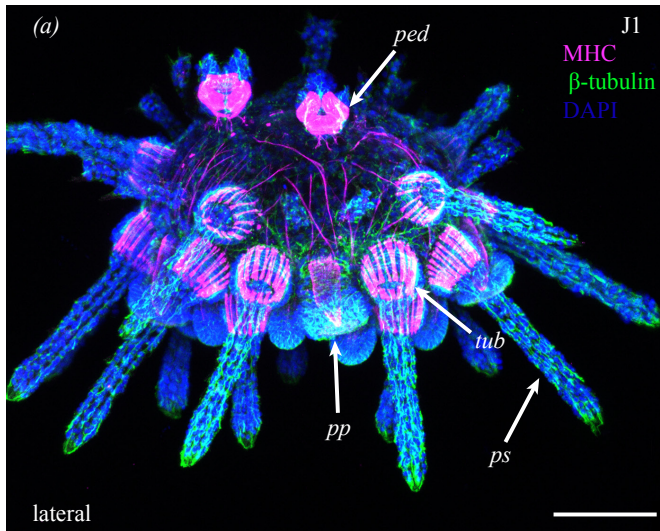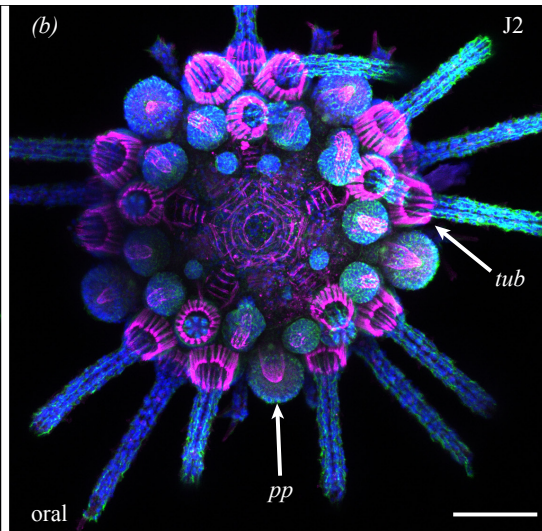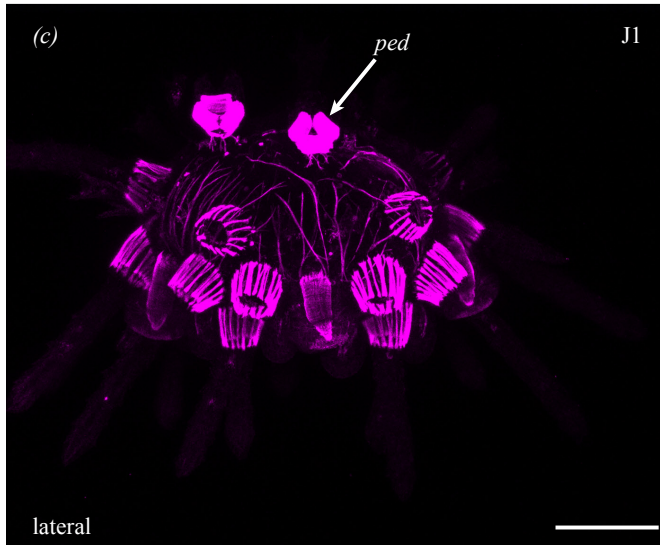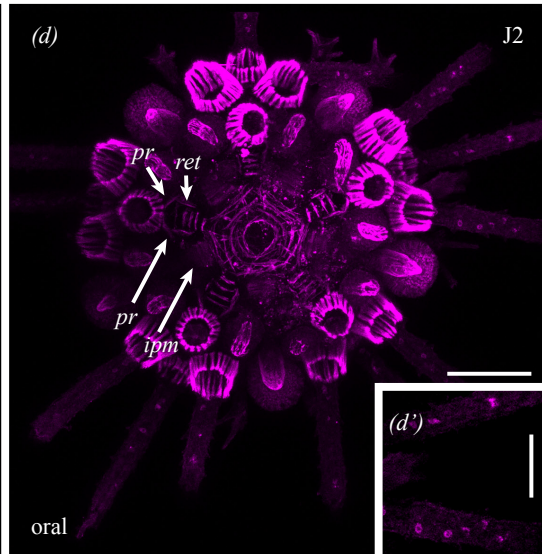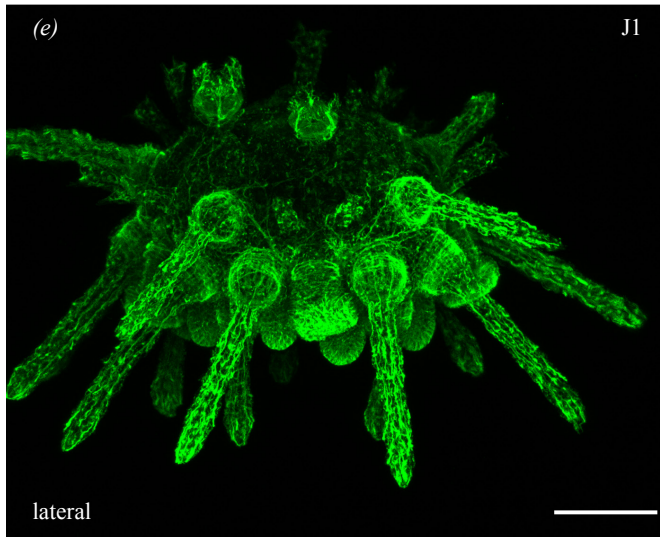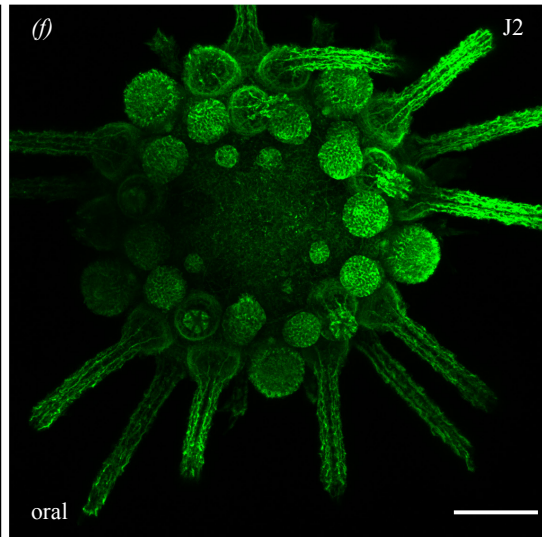

**Fig. S4. Musculature and morphology of *P. lividus* juveniles.** Confocal microscope images showing the distribution of MHC<sup>+</sup> tissues relative to tissues immunoreactive to an anti- $\beta$ -tubulin antibody and cell nuclei, marked with DAPI. (a) Image showing a lateral view of MHC immunoreactive cells relative to tissues marked with anti- $\beta$ -tubulin and DAPI in a J1 individual. MHC<sup>+</sup> tissues are present throughout the animal, with strong immunoreactivity in the pedicellariae, in longitudinally elongate-cells in the tubercles, and in longitudinal bands alongside the interior of the podia. This image is the same as Figure 2a in the main text. (b) Oral view showing location of MHC<sup>+</sup> and  $\beta$ -tubulin<sup>+</sup> tissues in a J2 *P. lividus*. As in the lateral view, MHC immunoreactive cells are clearly seen around the tubercles and alongside the interior of the podia. In the oral view, MHC<sup>+</sup> cells are also seen in latitudinal bands around the opening of the mouth in the peristomial membrane. Additionally, muscles involved in the protraction and retraction of the Aristotle's lantern are visible. (c) same image as (a), showing only the channel with MHC. Note, a few MHC<sup>+</sup> cells in the spines. (d) Single-channel image showing MHC channel from (b). Protractor and retractor muscles are visible within the animal, as well as interpyramidal muscles of the Aristotle's lantern. (d') Close-up showing single MHC<sup>+</sup> cells in the primary spines. Compare with Figure (S3b). (e) Lateral view showing the  $\beta$ -tubulin channel from (a).  $\beta$ -tubulin marks cilia on the outside of the animal, as well as tissues of the nervous system throughout the animal, including around the tubercles. (f) Oral view showing  $\beta$ -tubulin<sup>+</sup> cells.  $\beta$ -tubulin channel from (b).  $\beta$ -tubulin<sup>+</sup> cells are located throughout the animal, including in the tips of the podia. Abbreviations are as follows: ps, primary interambulacral spine; pp, primary podia; ped, pedicellariae; tub, tubercle; ipm, interpyramidal muscle; pr, protractor muscle; ret, retractor muscle. All scale bars are 100  $\mu$ m, except for (d'), which is 50  $\mu$ m.

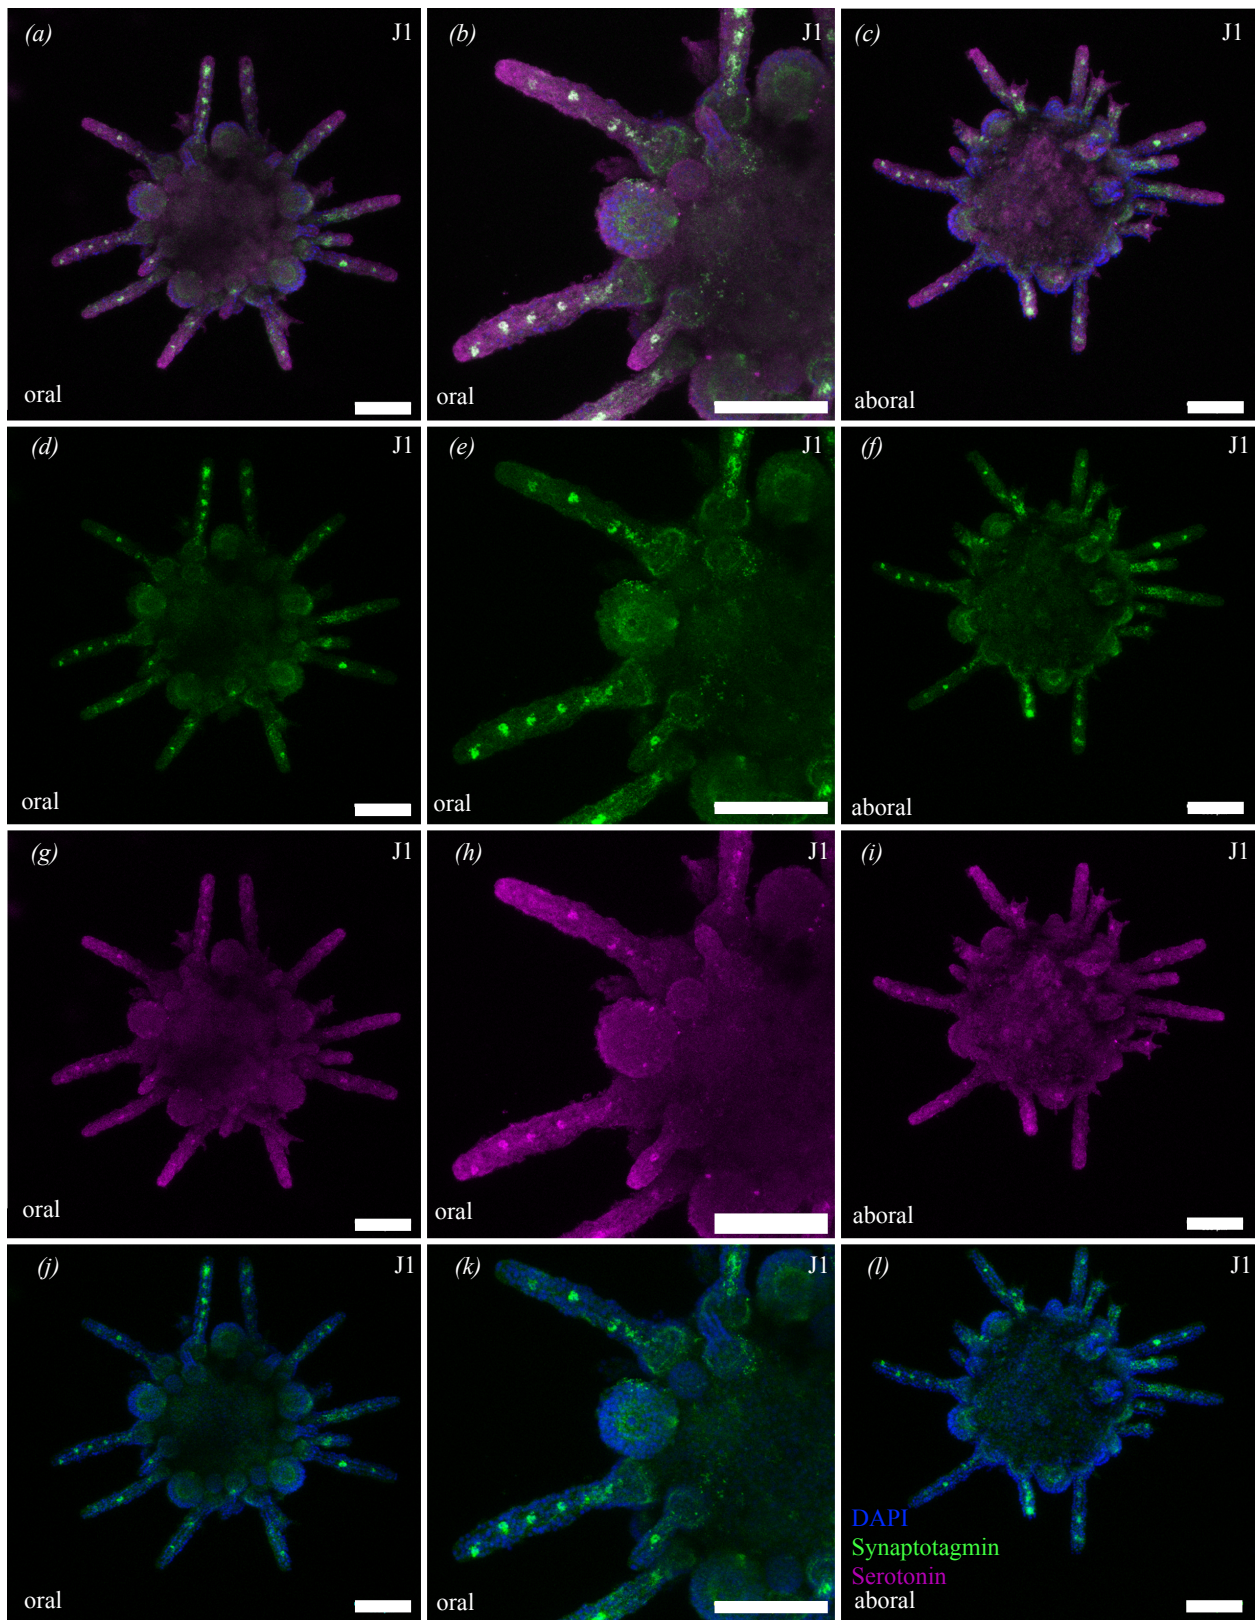

**Fig. S5 Localization of neuronal markers in early juveniles.** Confocal microscope images showing staining in J1 individual for synaptotagmin using 1E11 and serotonin using an anti-serotonin antibody. (a) Oral view of J1 individual showing immunoreactivity for synaptotagmin (green), and serotonin (magenta). Nuclei are stained with DAPI (blue). Synaptotagmin is localized within the interior of the primary podia, and in bands surrounding the tubercles and bases of the spines. Synaptotagmin and serotonin co-localize in single cells arranged proximodistally along the lumen of the primary interambulacral spines. This is the same as Figure 2d in the main text. (b) Close up of (a). (c) Aboral view of same individual as (a). (d) Green channel from (a) showing synaptotagmin. (e) Green channel from (b) showing synaptotagmin. Note the synaptotagmin<sup>+</sup> cells lining the lumen of the primary interambulacral spines. (f) Green channel from c showing synaptotagmin. (g) Magenta channel from a showing serotonin. (h) Magenta channel from (b) showing serotonin. Note the synaptotagmin<sup>+</sup> cells lining the lumen of the primary interambulacral spines, which we interpret to be serotonergic neurons. (i) Magenta channel from (c) showing Serotonin. (j) Green and blue channels from (a) showing synaptotagmin and DAPI. (k) Green and blue channels from (b) showing synaptotagmin and DAPI. (l) Green and blue channels from (c) showing synaptotagmin and DAPI. All scale bars in (c), (f), (i), (l) are 50  $\mu\text{m}$ , rest are 100  $\mu\text{m}$ .

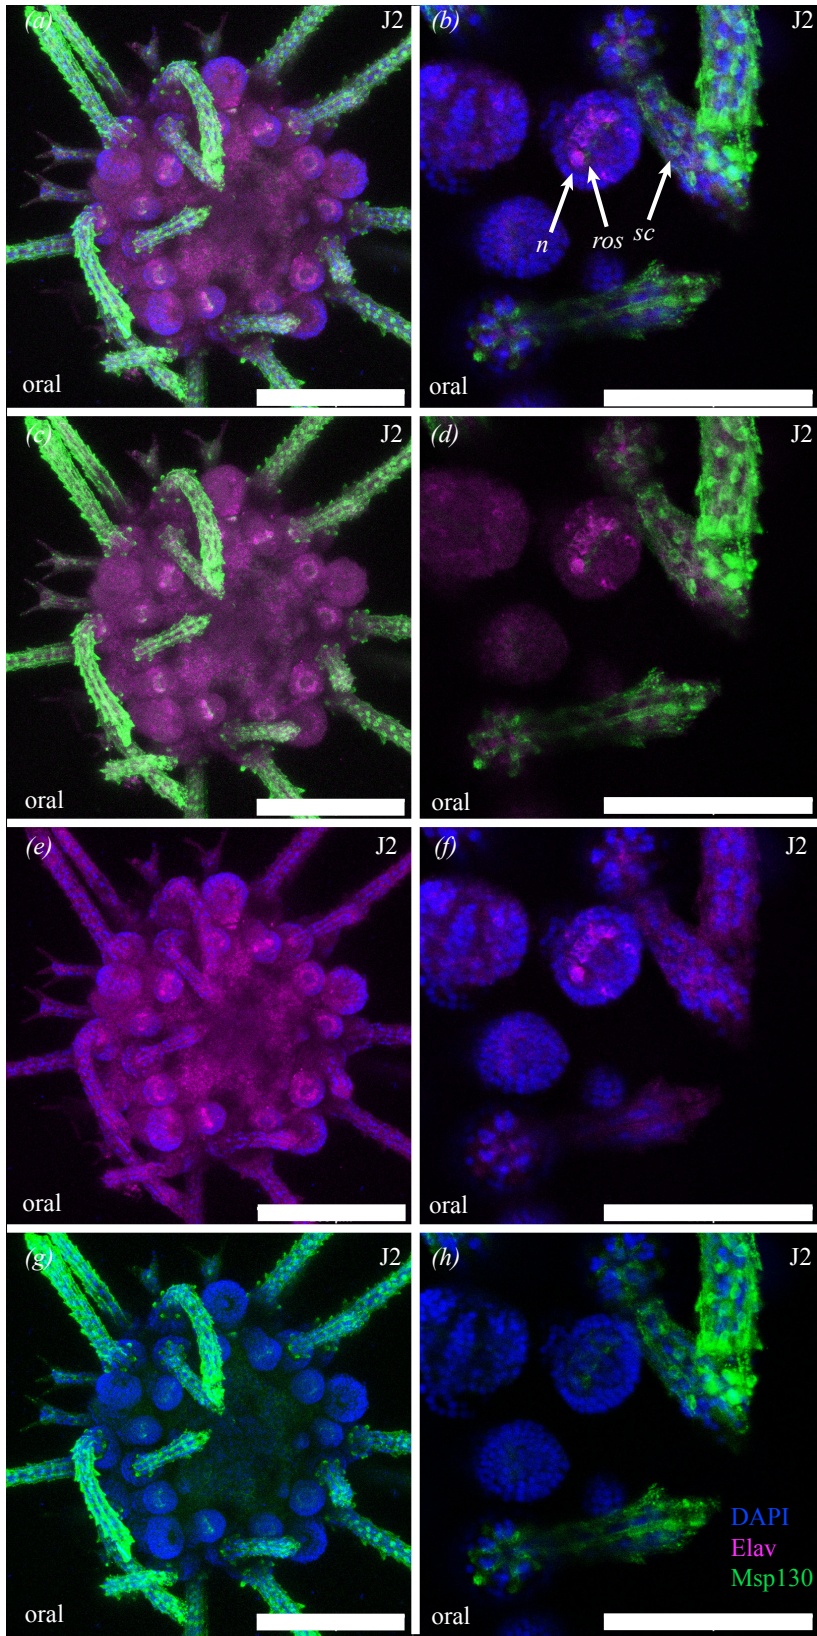

**Fig. S6. Neuronal and skeletal markers in early juveniles.** Confocal images showing localization of ELAV and Msp130 in J2 individual. (a) Staining for ELAV using an anti-ELAV antibody (Magenta), Msp130 using monoclonal antibody 6a9 (Green), and DAPI (blue). Msp130 is strongly localized in the primary and juvenile spines, and the rosettes while ELAV is localized in cells in the primary and secondary podia. (b) Close up of same individual as (a) showing ELAV<sup>+</sup> cells, interpreted to be neurons, in the secondary podia. In the interambulacral primary spines, Msp130 is localized in the cell bodies of cells that we interpret to be skeletogenic cells. This image is the same as figure 2c in the main text. (c) Magenta and green channels of (a), showing staining of ELAV and Msp130. (d) Magenta and green channels of (b). Importantly Msp130 and ELAV are differentially localized in the secondary podia, with ELAV marking neurons, and Msp130 staining the growing rosette. (e) Magenta and blue channels of (a), showing ELAV and DAPI. (f) Magenta and blue channels of (b), showing ELAV and DAPI. Cell nuclei are marked by DAPI, but ELAV stains the surrounding cell body. (g) Green and blue channels of a, showing MSP130 and DAPI. (h) Green and blue channels of (b), showing Msp130 and DAPI. As with ELAV, Msp130 stains the cell body, while nuclei of the same cells are marked with DAPI. n, neuron; ros, rosette; sc, skeletogenic cell. Scale bars in (a), (c), (e), (g) are 200  $\mu\text{m}$ , scale bars in (b), (d), (f), (h) are 100  $\mu\text{m}$ .



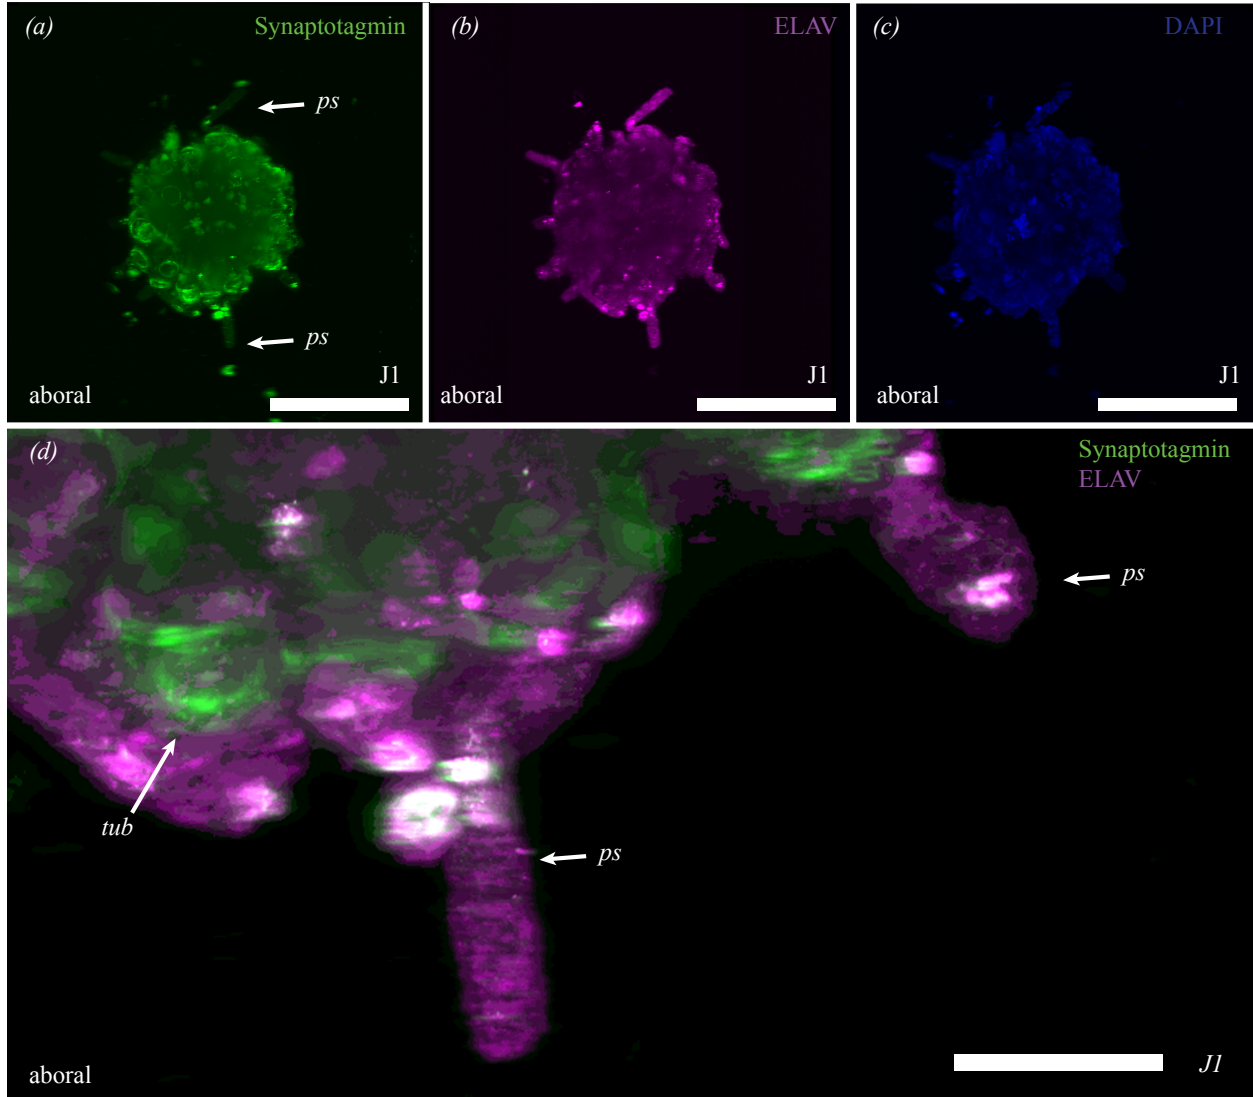

**Fig. S7. Specific and pan-neuronal markers.** Confocal images showing localization of ELAV and Synaptotagmin in J1 individual. (a) Staining for synaptotagmin (green). Notice rings of nerves surrounding tubercles and in bundles of neurons in the primary spines. (b) Staining for ELAV. Notice bundles of neurons in primary spines. (c) DAPI staining showing distribution of cell nuclei. (d) Merge showing co-localization of Synaptotagmin and ELAV. Of importance is the fact that co-localization is most strong in the bundles of neurons at the base of the primary spines. Scale bars in (a)-(c) are 200  $\mu\text{m}$ , (d) is 50  $\mu\text{m}$ .

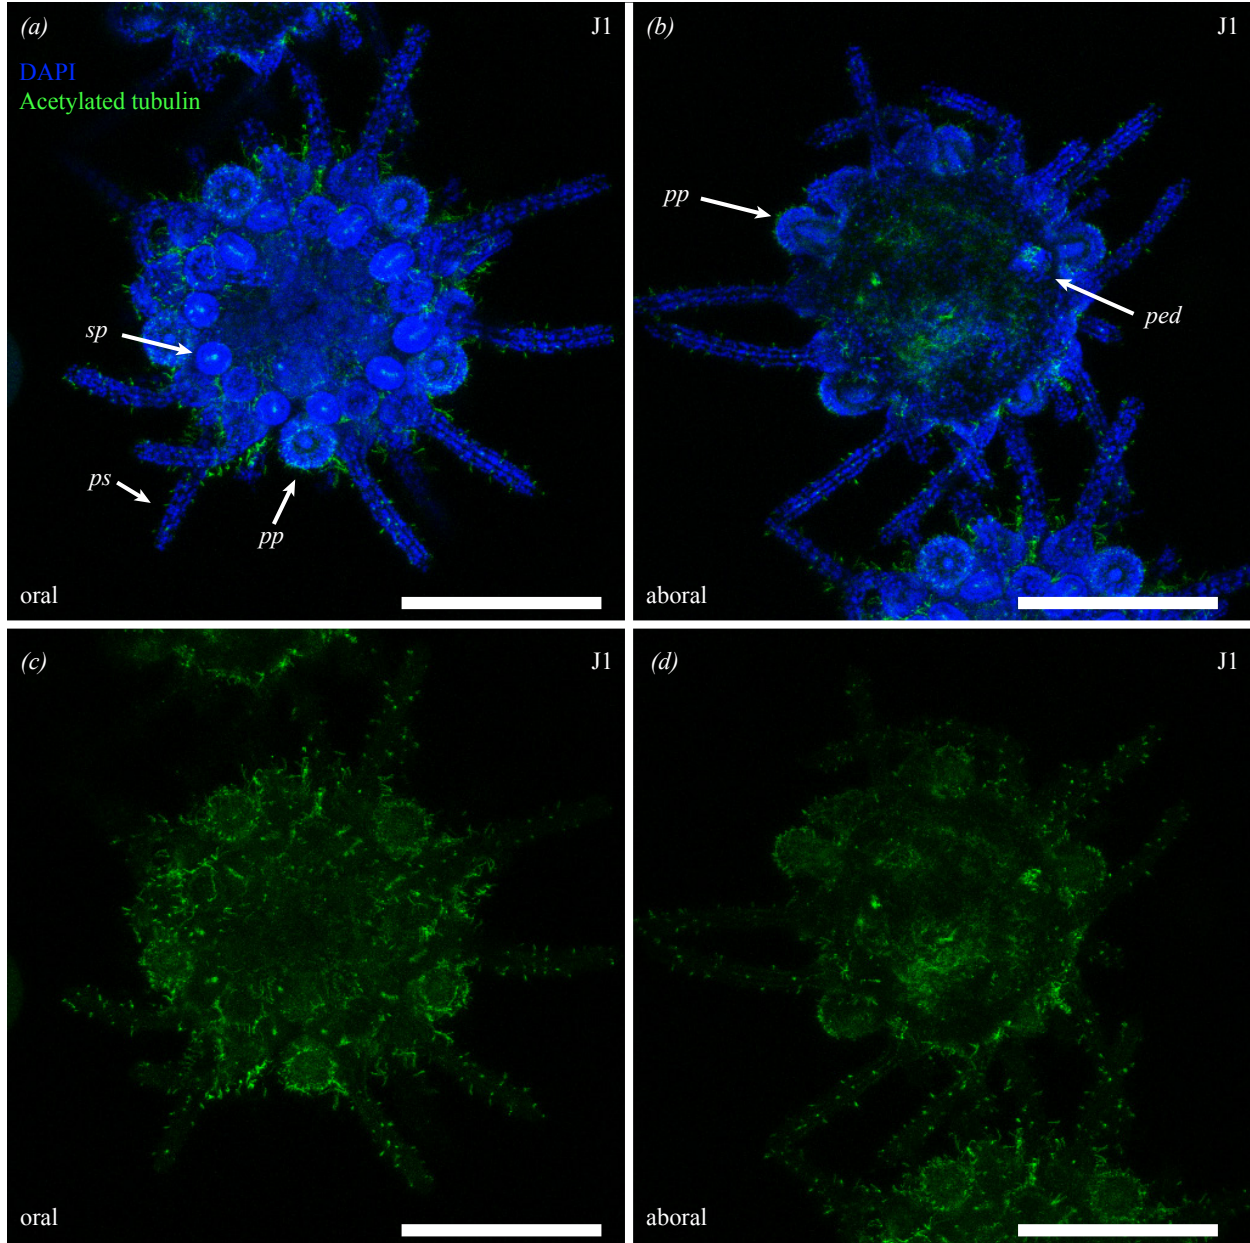

**Fig. S8 Localization of acetylated tubulin.** Confocal images showing staining for acetylated tubulin and DAPI in J1 animals. (a) Merge showing staining for acetylated tubulin (green) using an anti-acetylated tubulin antibody and for cell nuclei using DAPI (blue) on the oral surface. Cilia cover the entire surface of the animal and the lateral edges of the spines, as shown in Gosselin and Jangoux [1]. Acetylated tubulin is also found in the interior of the primary and secondary podia, which we interpret to be tissue of the nervous system in agreement with a recent study [2]. (b) Staining for acetylated tubulin and cell nuclei on the aboral surface of a different J1 individual. Cilia are found across the surface of the animal, and show a high density on pedicellariae. The individual from (a) is shown in the bottom of the image. (c) Green channel from (a) showing only staining for acetylated tubulin. Note the cilia lining the margin of the discs of the primary podia. (d) Green channel from (b) showing staining of acetylated tubulin. pp,

primary podia; sp, secondary podia; js, juvenile spine; ps, primary interambulacral spine; ped, pedicellariae. Scale bar in all images is 200  $\mu\text{m}$ .

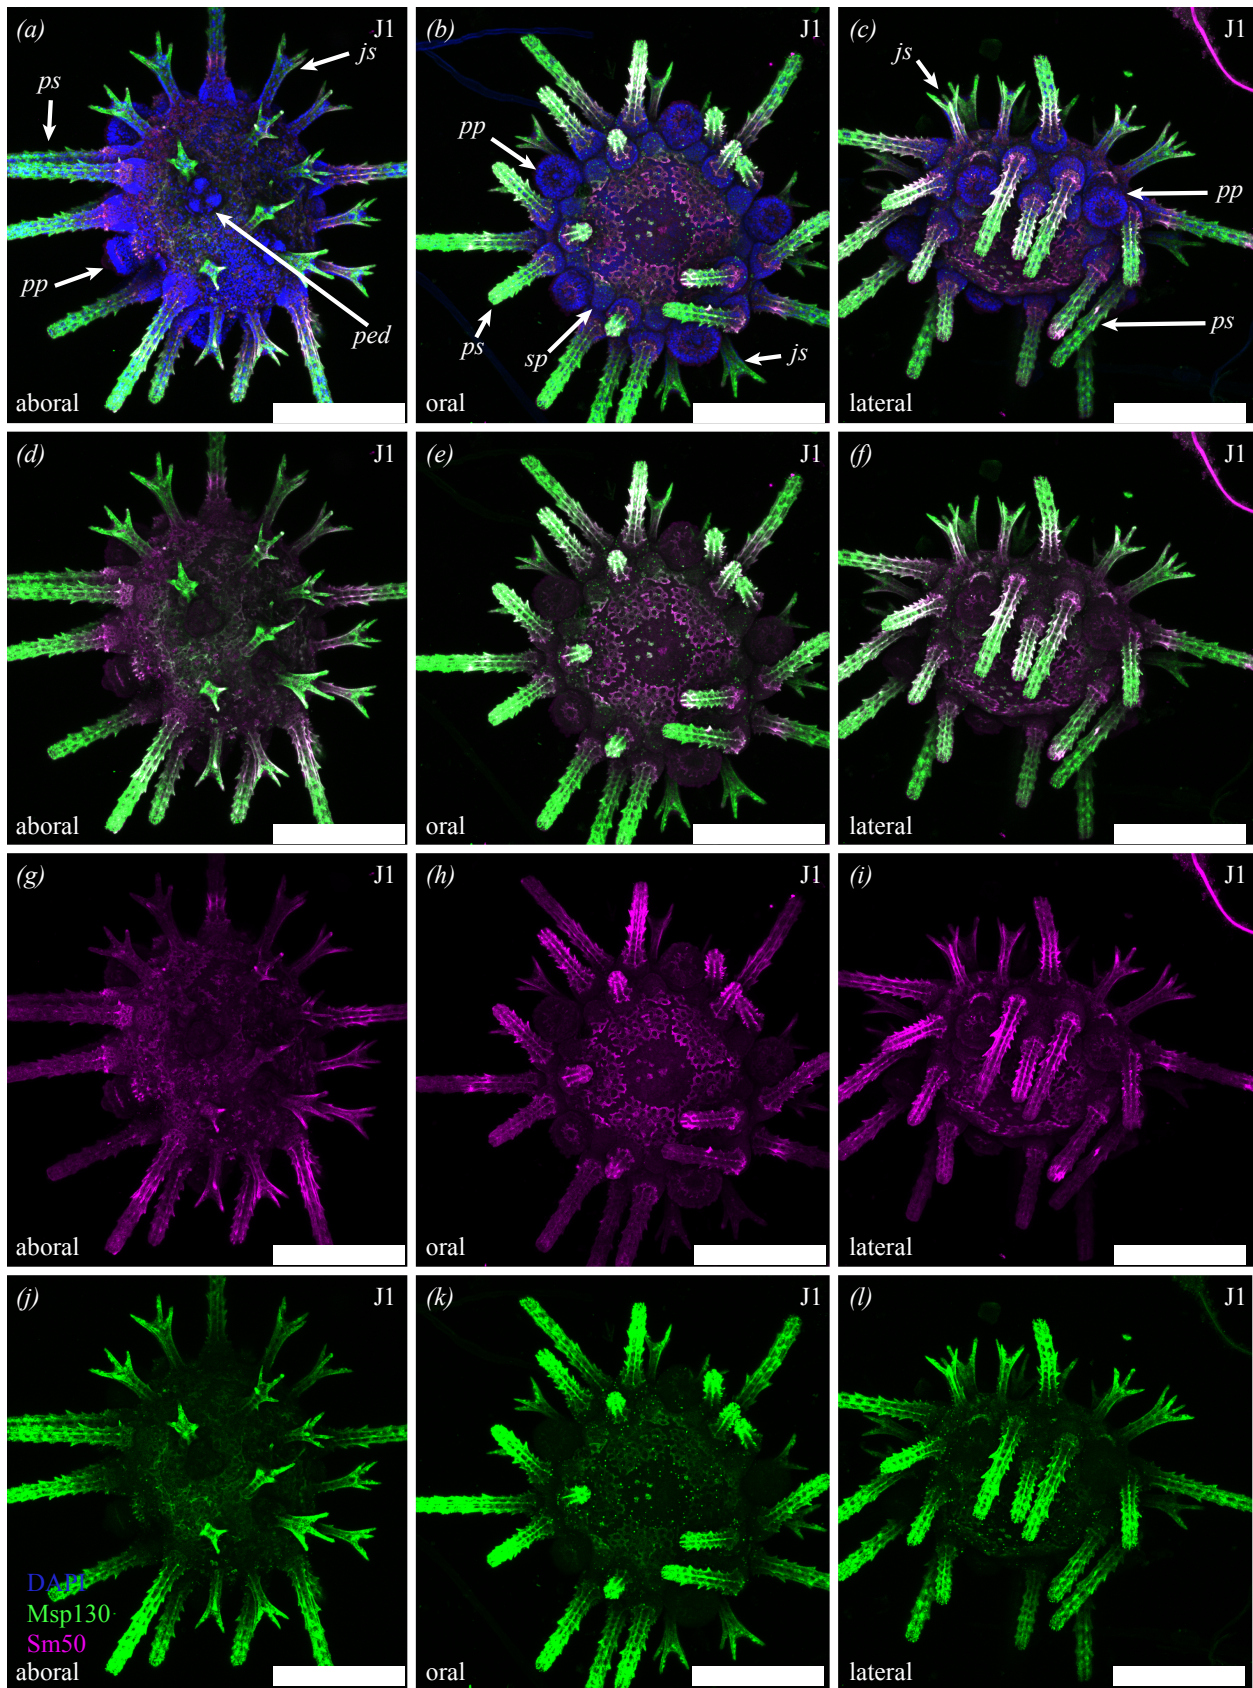

**Fig. S9** Localization and co-localization of skeletal proteins in young juveniles. Localization

of the skeletogenic proteins Msp130 (green) and Sm50 (purple) in a J1 *P. lividus* juvenile. (a)-(c)- show localization of Msp130 and Sm50 relative to DAPI (blue), which stains for nuclei. (d)-(f) show both distinct localization, and co-localization of Msp130 and Sm50 in skeletal tissues. (g)-(i) show localization of Sm50, staining is strongest around the margins of plates, in median portions of spines, and in milled-rings of spines. (j)-(l) Staining of Msp130 in skeletal tissues. Staining is strongest in the tips of spines. pp, primary podia; sp, secondary podia, ps, primary interambulacral spine; ped, pedicellariae. These images are the same as those shown in Figure 2i-1 in the main text. Scale bars 200  $\mu\text{m}$ .

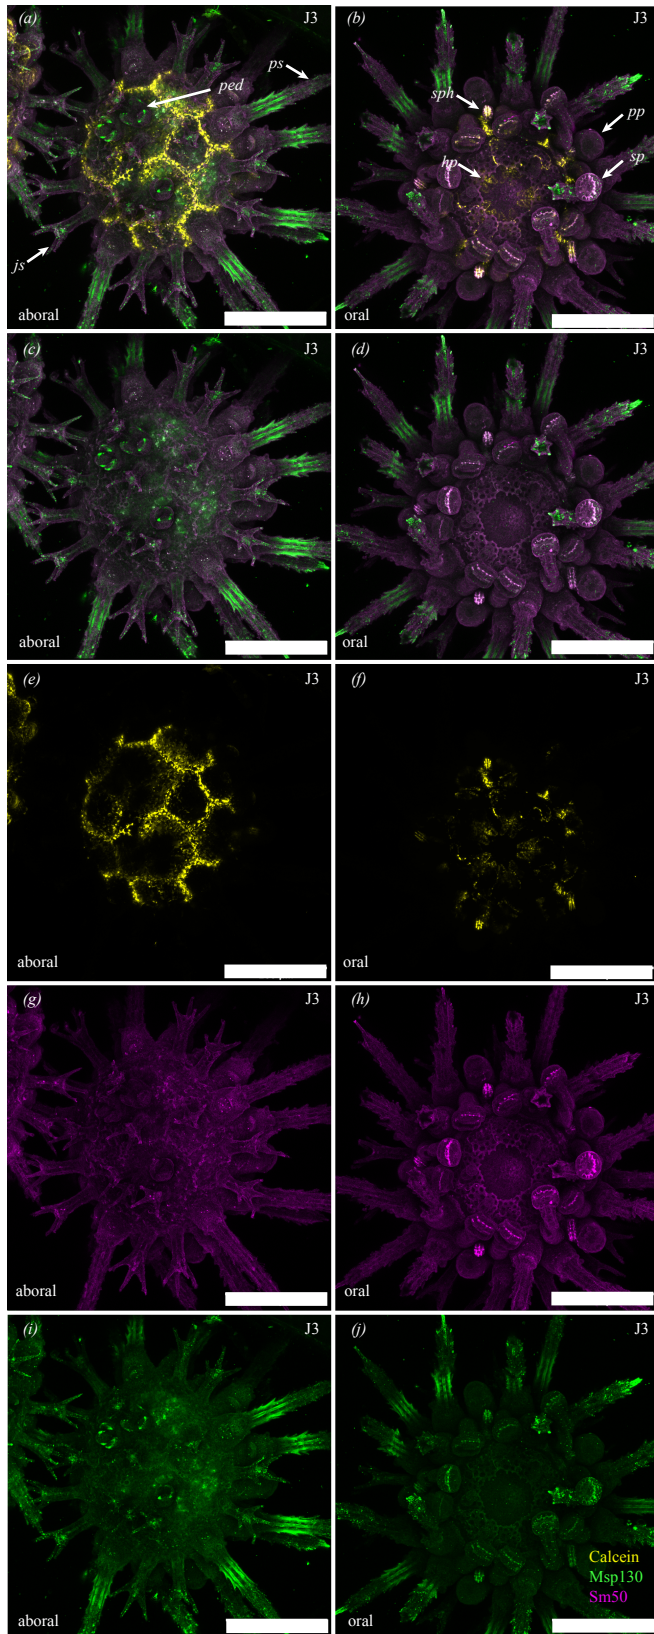

**Fig. S10 Calcein localization relative to skeletal proteins.** Confocal microscopy showing staining of Sm50 using an anti-Sm50 antibody (magenta), and Msp130 using monoclonal

antibody 6a9 (green), as well as the incorporation of fluorescent calcein (yellow) into the growing J3 sea urchin test. (a) Aboral surface showing incorporation of calcein into the margins of accreting genital, anal, ocular and interambulacral plates. Msp130 and Sm50 are also shown, and reveal distinct patterns of localization and co-localization. (b) Oral surface of same individual shown in (a). Calcein is shown incorporated into margins of accreting ambulacral and interambulacral plates, elongating sphaeridia, growing hemipyramids, and rosettes. There is co-localization of Sm50 and Msp130 in sites of calcein incorporation, implicating Sm50 and Msp130 in active skeletogenesis. (c) Same as (a), with calcein removed. Co-localization of Msp130 and Sm50 is indicated by greyish-white color. This is evident at the margins of genital and interambulacral plates, as well as in the tubercles. Compared with (a) and (e), it is evident that strong co-localization of these skeletogenic genes occurs in sites of accretion as identified using calcein. (d) Same as (b), with calcein removed. Co-localization of Msp130 and Sm50 is evident in the margins of accreting peristomial, ambulacral, and interambulacral plates, as well as in the elongating sphaeridia and rosettes of secondary podia. Compared with (a), and (f), this co-localization is evident in sites of calcein incorporation. (e) Yellow channel from (a), showing sites of calcein incorporation in genital, interambulacral and anal plate margins. Compare with co-localization of skeletogenic proteins in (c). (f) Yellow channel from (b), showing sites of calcein incorporation in margins of accreting peristomial, ambulacral, and interambulacral plates, and growing hemipyramids, rosettes and sphaeridia. Compare with sites of skeletogenic protein localization in (d), (h), and (j). (g) Purple channel from (a), showing localization of Sm50 protein. Immunoreactivity is stronger in the bases of spines and tubercles, and in the margins of genital, anal and interambulacral plates. (h) Purple channel from (b), showing localization of SM50. Immunoreactivity is stronger in margins of peristomial plates, elongating sphaeridia, and rosettes of secondary podia. (i) Green channel from a showing localization of Msp130 proteins using 6a9. Immunoreactivity is stronger in the medial and distal portions of interambulacral spines, and in the distal portions of juvenile spines and pedicellariae. (j) Green channel from (b) showing localization of Msp130 protein using 6a9. Localization is strongest in medial and distal portions of interambulacral spines, in the rosettes, in elongating sphaeridia and in the margins of peristomial plates. ps primary spine; js, juvenile spine; ped, pedicellariae; sph, sphaeridia, pp, primary podia; sp, secondary podia; hp, hemipyramid. These images are the same as those shown in Figure 3a-b of the main text. Scale bar in all images is 200  $\mu\text{m}$ .

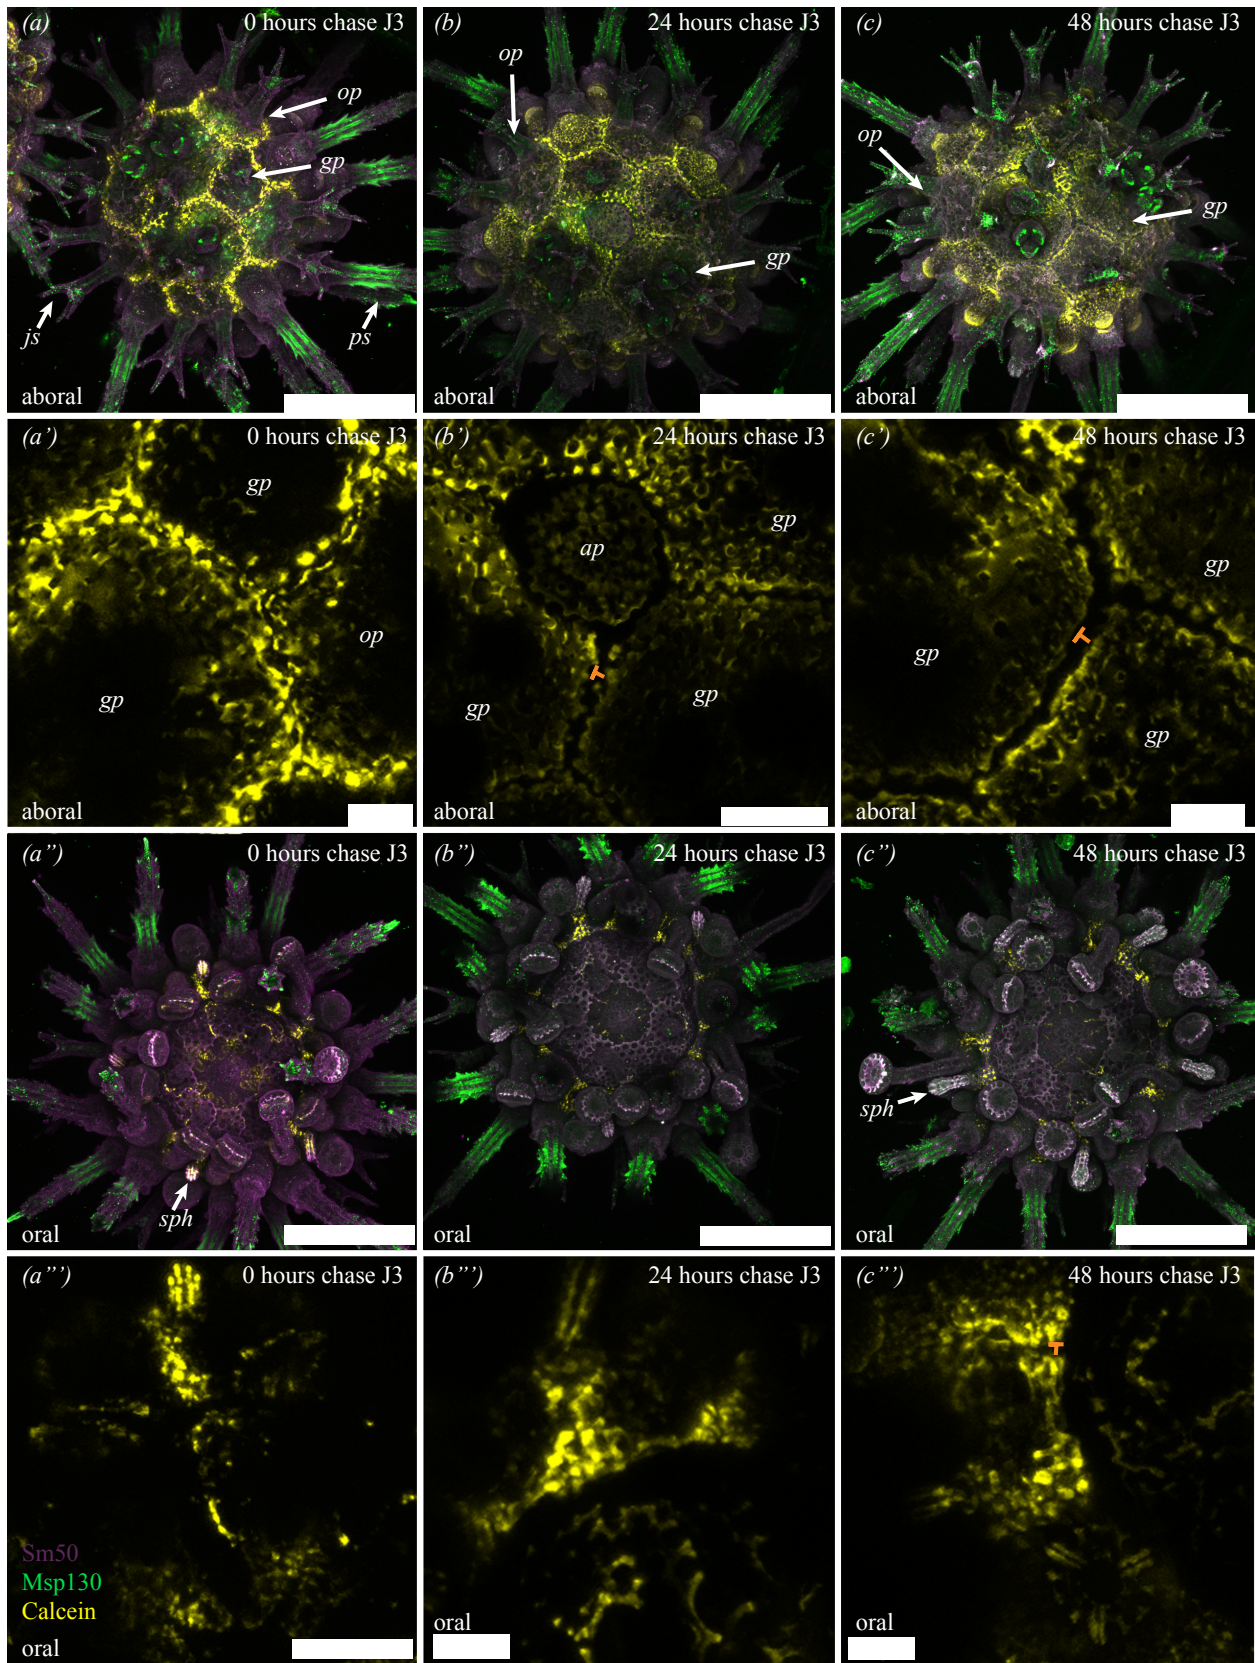

**Fig. S11. Skeletal growth over time.** Localization of Msp130 (green), Sm50 (purple), and



incorporation of calcein (yellow) into growing skeleton in J3 individuals at 0 (a-a'''), 24 (b-b'''), and 48 (c-c''') hours chase. Description of staining given in the main text. a', b', c' and a''', b''', and c''' are zoomed in images of the above showing incorporation of calcein. Orange bars indicate gap between calcein-marked plated due to subsequent accretion. ps primary spine; js, juvenile spine; op, ocular plate, gp, genital plate; ap, anal plate; sph, sphaeridia. Images are the same as individuals in Figures 3a,b,d,e in the main text. Scale bars in a-c and a'''-c''' 200  $\mu\text{m}$ , a',b''', c', c'' 25  $\mu\text{m}$ , b' and a''' 50  $\mu\text{m}$ .

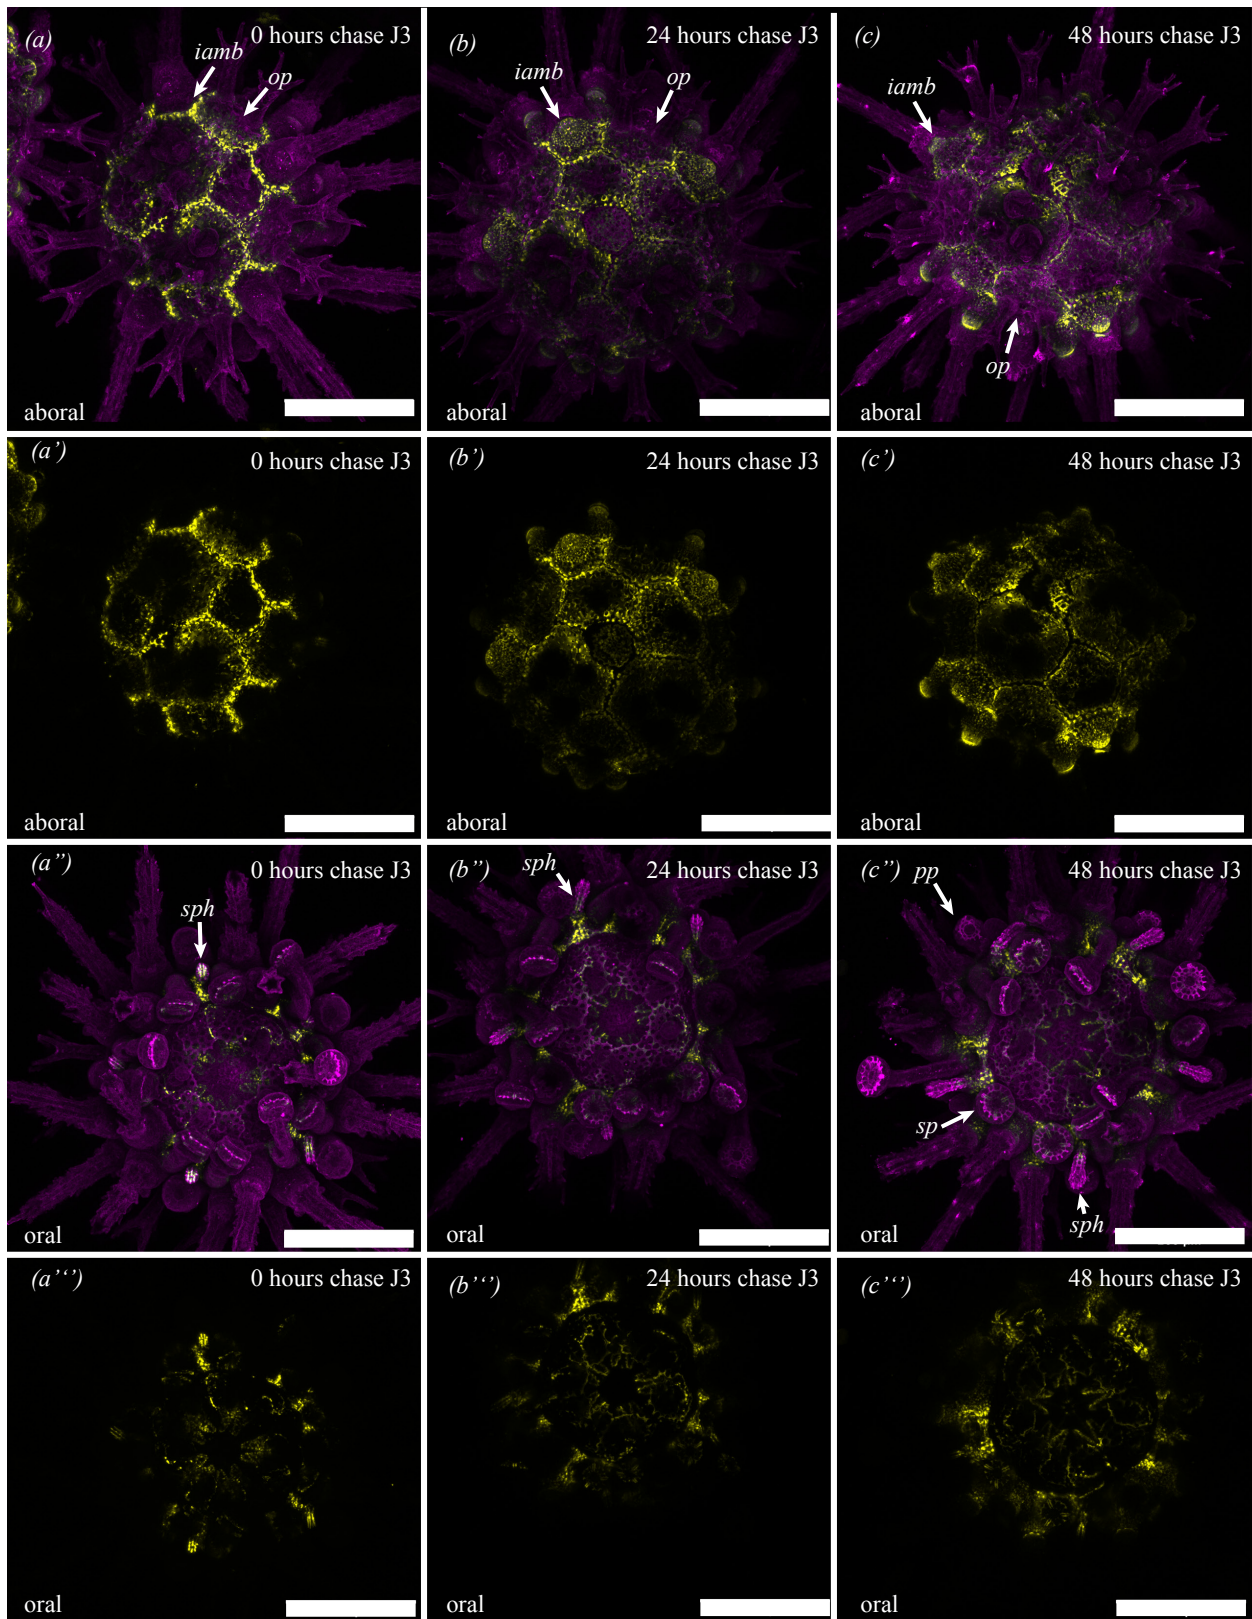

**Fig. S12. Calcein and Sm50.** Confocal microscopy showing staining for Sm50 using an anti-Sm50 antibody (magenta), and the incorporation of fluorescent calcein (yellow) into the J3 sea

urchin test at 0, 24, and 48 hours chase. (a) Aboral surface from 0 hours chase animal showing incorporation of calcein relative to localization of Sm50. Image is the same as Figure 3a in the main text, with green channel (MSP130) removed. Sm50 is localized throughout all visible skeletal structures, including localization in areas of calcein incorporation such as the margins of plates, shown in whiteish-grey. (a') Yellow channel from (a), showing sites of calcein incorporation in aboral surface of 0 hours chase animal. (a'') Oral surface from 0 hours chase animal, showing incorporation of calcein into skeleton relative to localization of Sm50. Sm50 stains the entire skeleton except for the teeth, and is localized in sites of calcein incorporation in the sphaeridia, rosettes, and margins of peristomial, ambulacral, and interambulacral plates. Image is the same as Figure 3b in the main text, with green channel (Msp130) removed. (a''') Yellow channel from (a'') showing incorporation into oral surface of 0 hours chase animal. (b) Aboral surface of 24 hours chase animal showing incorporation of calcein relative to staining for Sm50. Additional skeletogenesis at the margin of plates has taken place in the 24 hours since calcein incubation, as evident in the gaps between calcein-incorporated skeleton in adjacent plates. Sm50 is still strongly localized in some areas of calcein incorporation, such as the tubercles and margins of plates. Image is the same as Figure 3d in the main text, with green channel (Msp130) removed. (b') Yellow channel from (b), showing incorporation of calcein into aboral surface of 24 hours chase animal. (b'') Incorporation of calcein and localization of Sm50 protein in oral surface of 24 hours chase animal. Sm50 is localized where calcein was incorporated into the skeleton in the ambulacral, peristomial and interambulacral plates, but strong Sm50 localization is also evident in skeleton that has been deposited subsequent to incubation with calcein. This is most evident in the margins of the peristomial plates, in the elongating sphaeridia, and in the rosettes of secondary podia. (b''') Yellow channel showing incorporation of calcein in the skeleton of the oral surface of a 24 hours chase animal. (c) Incorporation of calcein and localization of Sm50 in the skeleton of the aboral surface of a 48 hours chase animal. Gaps between sites of calcein incorporation in adjacent plates (of maximum size of 7.5  $\mu\text{m}$ ) are clearly visible on the aboral surface. Additionally, strong Sm50 localization in these gaps, and in other structures such as the tubercles, bases of primary spines, and margins of plates are indicative of further biomineralization involving Sm50. (c') Yellow channel from c showing incorporation of calcein into aboral skeleton of 48 hours chase animal. Image is the same as zoom of Figure 3e in the main text. (c'') Oral surface of 48 hours chase animal showing incorporation of calcein and localization of Sm50. Substantial growth has taken place in the 48 hours since the incorporation of calcein, which is evident in the strong localization of Sm50 in the sphaeridia, in the margins of the peristomial plates, and in the rosettes of secondary podia. Additionally, gaps between areas of calcein incorporation are present in ambulacral and interambulacral plates. (c''') Yellow channel of (c'') showing incorporation of calcein into oral surface of 48 hours chase animal. iamb, interambulacral plate; op, ocular plate; sph, sphaeridia; pp, primary podia; sp, secondary podia. Scale bar in all images is 200  $\mu\text{m}$ .

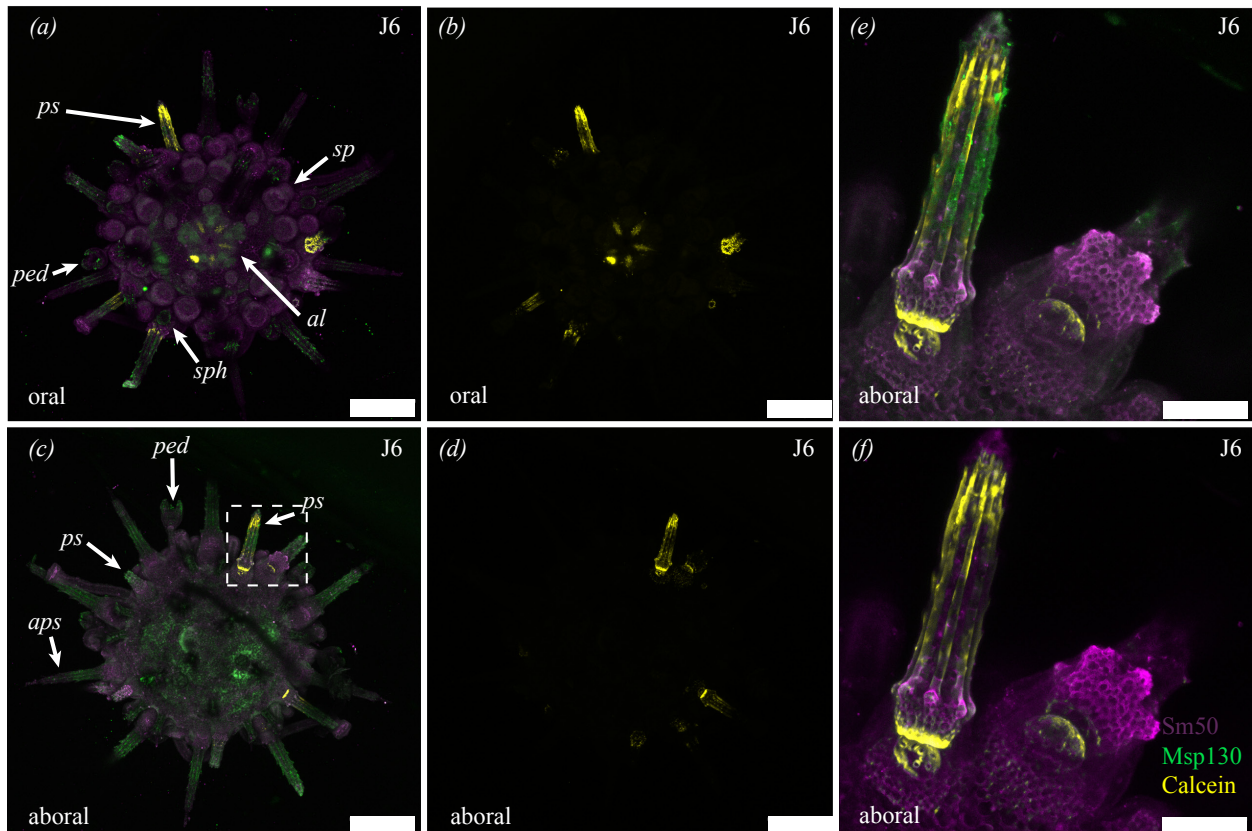

**Fig. S13. Skeletal growth in older (J6) juvenile.** Localization of SM50 (purple), MSP130 (green) and incorporation of calcein (yellow) into J6 animal at 0 hours chase. (a) shows staining of MSP130, SM50, and incorporation of calcein into oral surface. This is the same image as Figure 3c in the main text. (b) is yellow channel from (a) showing calcein in the Aristotle's lantern, rosettes, and spines. (c) is the aboral surface of the same J6 animal from (a). (d) shows the yellow channel with calcein from (c). (e-f) are close ups of the aboral surface from (c) showing incorporation of calcein into growing spines and tubercles relative to MSP130 and SM50 (e) and only SM50 (f). (e) is the same as Figure 3f from the main text. ps primary spine; sp, secondary podia; sph, sphaeridia; ped, pedicellariae; aps, ambulacral primary spine. Scale bars in a-d 200  $\mu\text{m}$  and e-f 50  $\mu\text{m}$ .

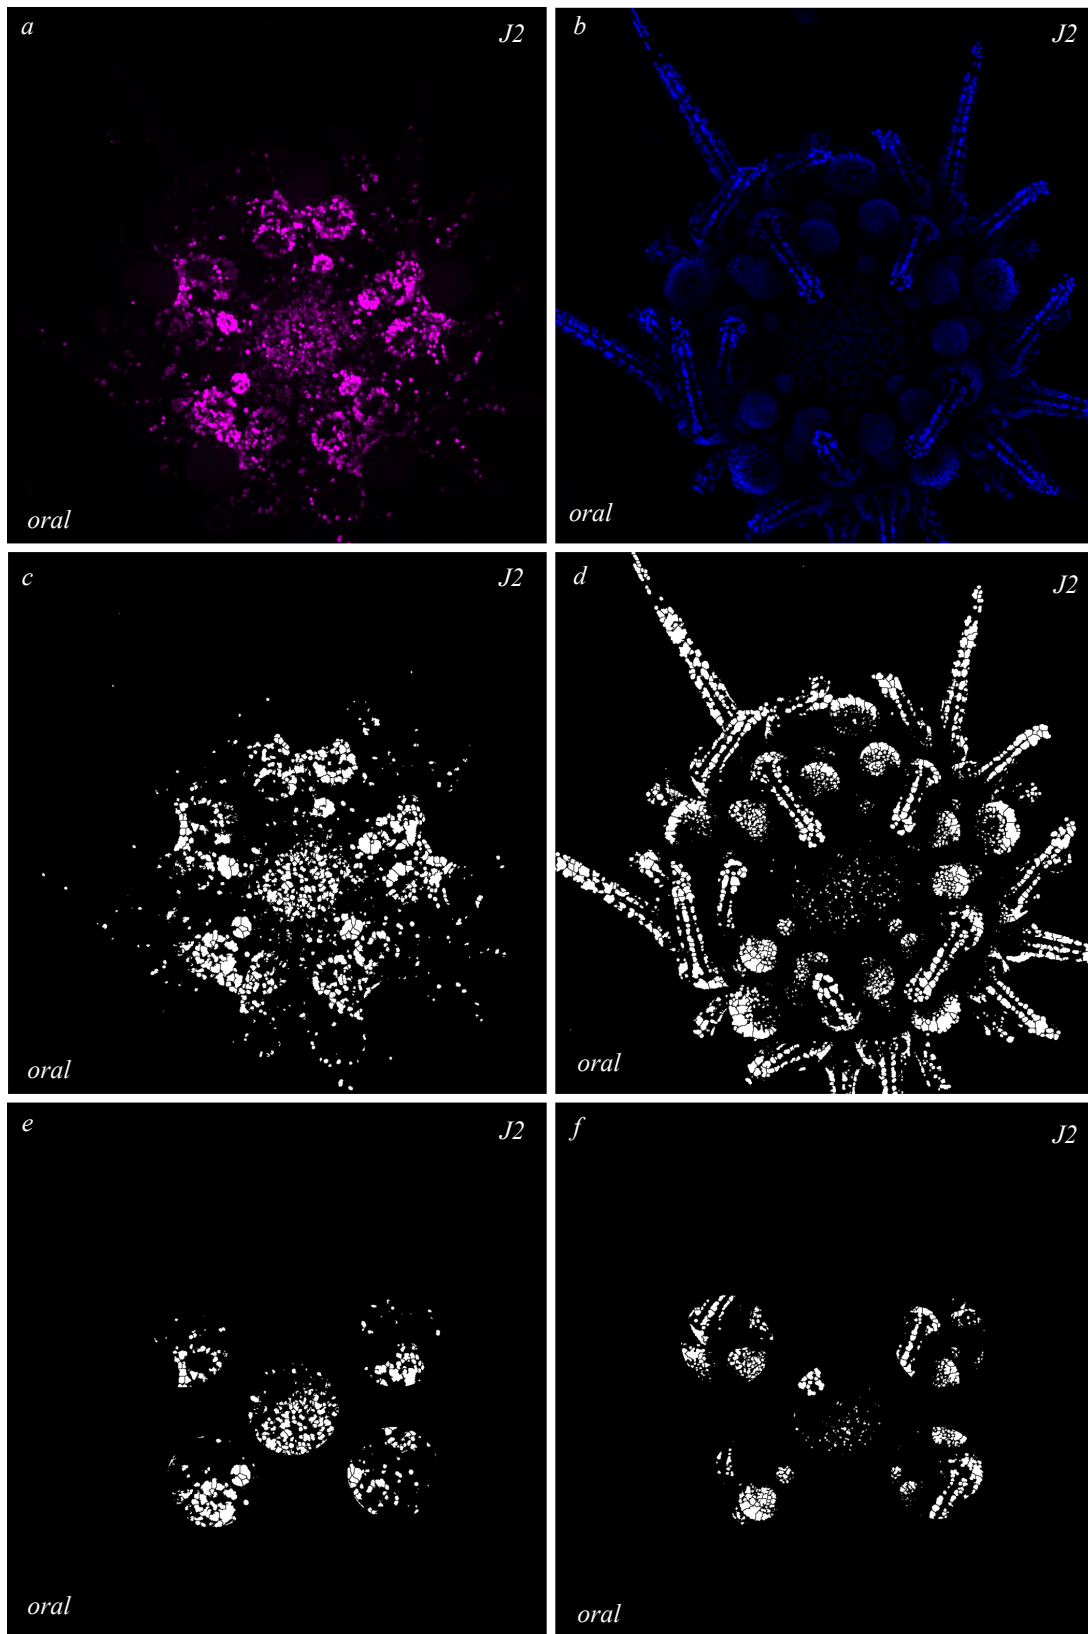

**Fig S14. Images showing different stages of the strategy used to quantify EdU<sup>+</sup> nuclei relative to all nuclei. (a) and (b) Show raw images for EdU<sup>+</sup> (a) and DAPI<sup>+</sup> cells (b). (c-d)**

Binary images for quantification. (e-f) Five regions of interest of binary cells for quantification. See expanded details in Supplemental Methods. Image is the same as Figure 4b from the main text.

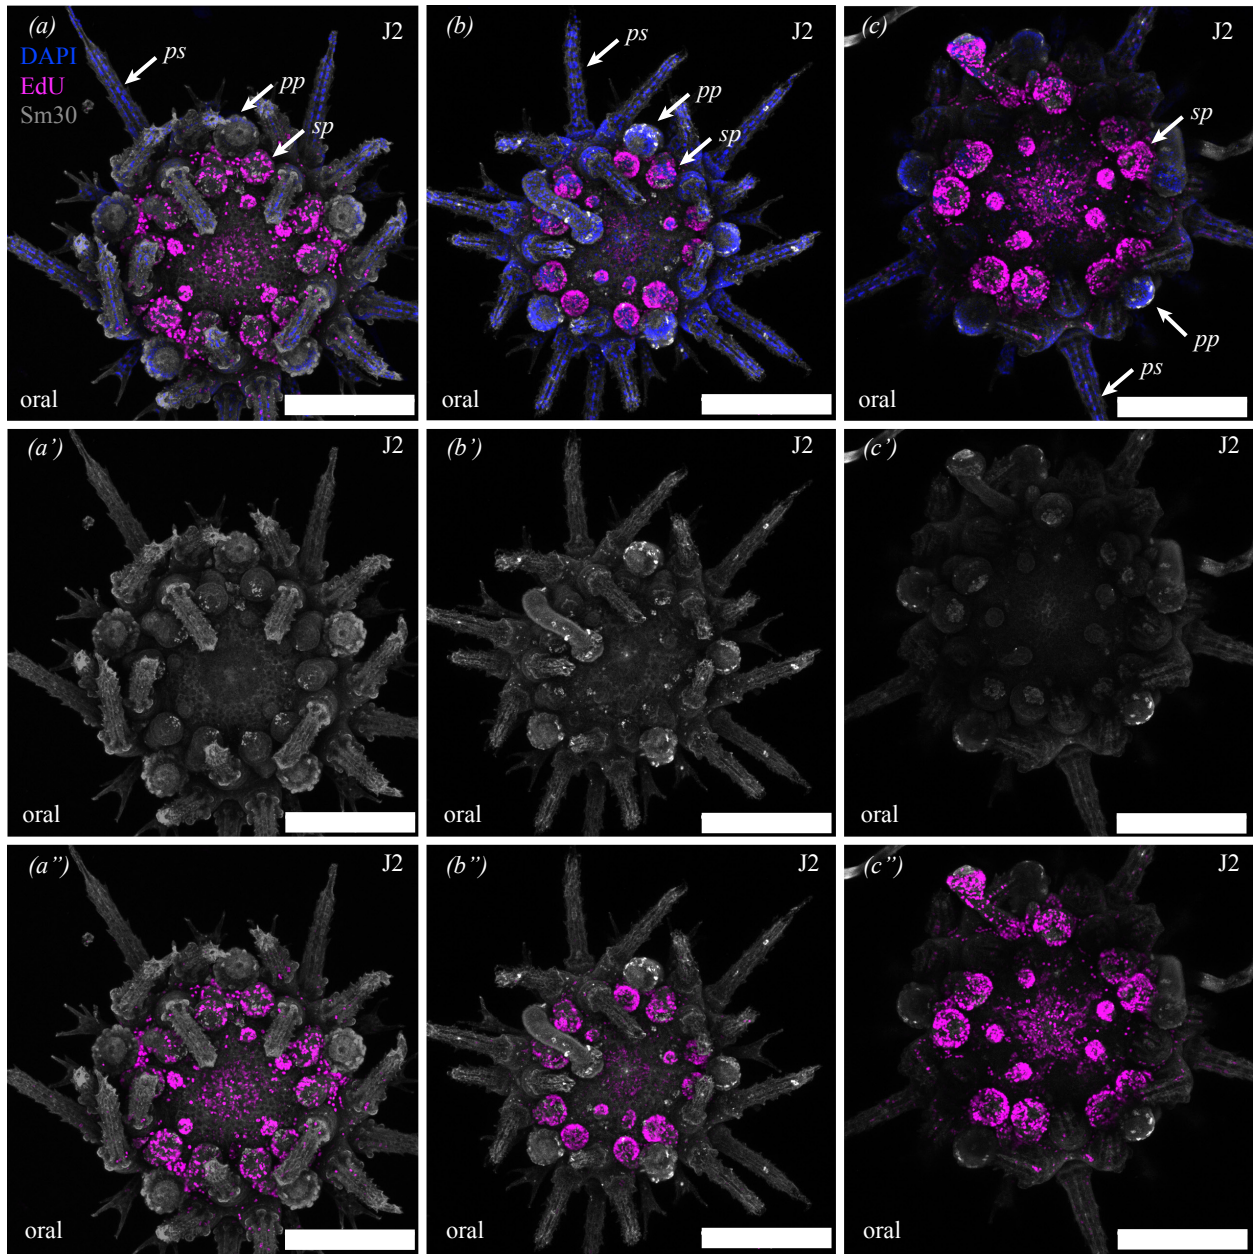

**Fig. S15. Cell proliferation pulse-chase in early juvenile stages.** Confocal microscope images showing the incorporation of EdU into the oral surface of growing J2 sea urchins, as well as staining for Sm30 using an anti-SM30 antibody. (a) Staining for EdU (magenta), Sm30 (gray), and cell nuclei using DAPI (blue) in the oral surface of a 0 hours chase individual. Most proliferation takes place in the secondary podia and growing peristomial podia. Additionally, immediately adoral to the primary podia, there is a zone of cell proliferation corresponding to the zone where new plates are added. Of interest, there is no proliferation in the primary podia themselves, which form in the rudiment and atrophy within a few weeks following metamorphosis [1]. (a-a'') are the same image as Figure 4b from the main text. (a') Gray channel from a showing localization of Sm30. Protein is localized in all skeletal tissue except for the teeth and is most strongly localized in the primary interambulacral spines. (a'') Localization

of Sm30 relative to proliferating cells marked by EdU. There is very little proliferation in the primary spines and in the peristomial test plates. (b) Staining for EdU, Sm30, and cell nuclei using DAPI in a 24 hours chase individual. As in the 0 hours chase individuals, most proliferating cells are located in the secondary and peristomial podia, and the proliferative zone adoral to the primary podia. (b') Gray channel from (b), showing localization of Sm30. (b'')

Localization of Sm30 relative to proliferative cells marked by EdU. (c) Staining for EdU, Sm30, and cell nuclei using DAPI in a 48 hours chase individual. Localization of EdU<sup>+</sup> cells does not differ substantially from 0 and 24 hours chase individuals. Presence of cell doublets indicates that rates of cell division are relatively slow, and that not much cell division has taken place in the 48 hours since incubation with EdU. (c') Gray channel showing localization of Sm30. (c'')

Location of EdU<sup>+</sup> cells relative to skeletal tissues identified using Sm30. ps, primary interambulacral spine; pp, primary podia; sp, secondary podia. Scale bar in all images is 200  $\mu$ m.



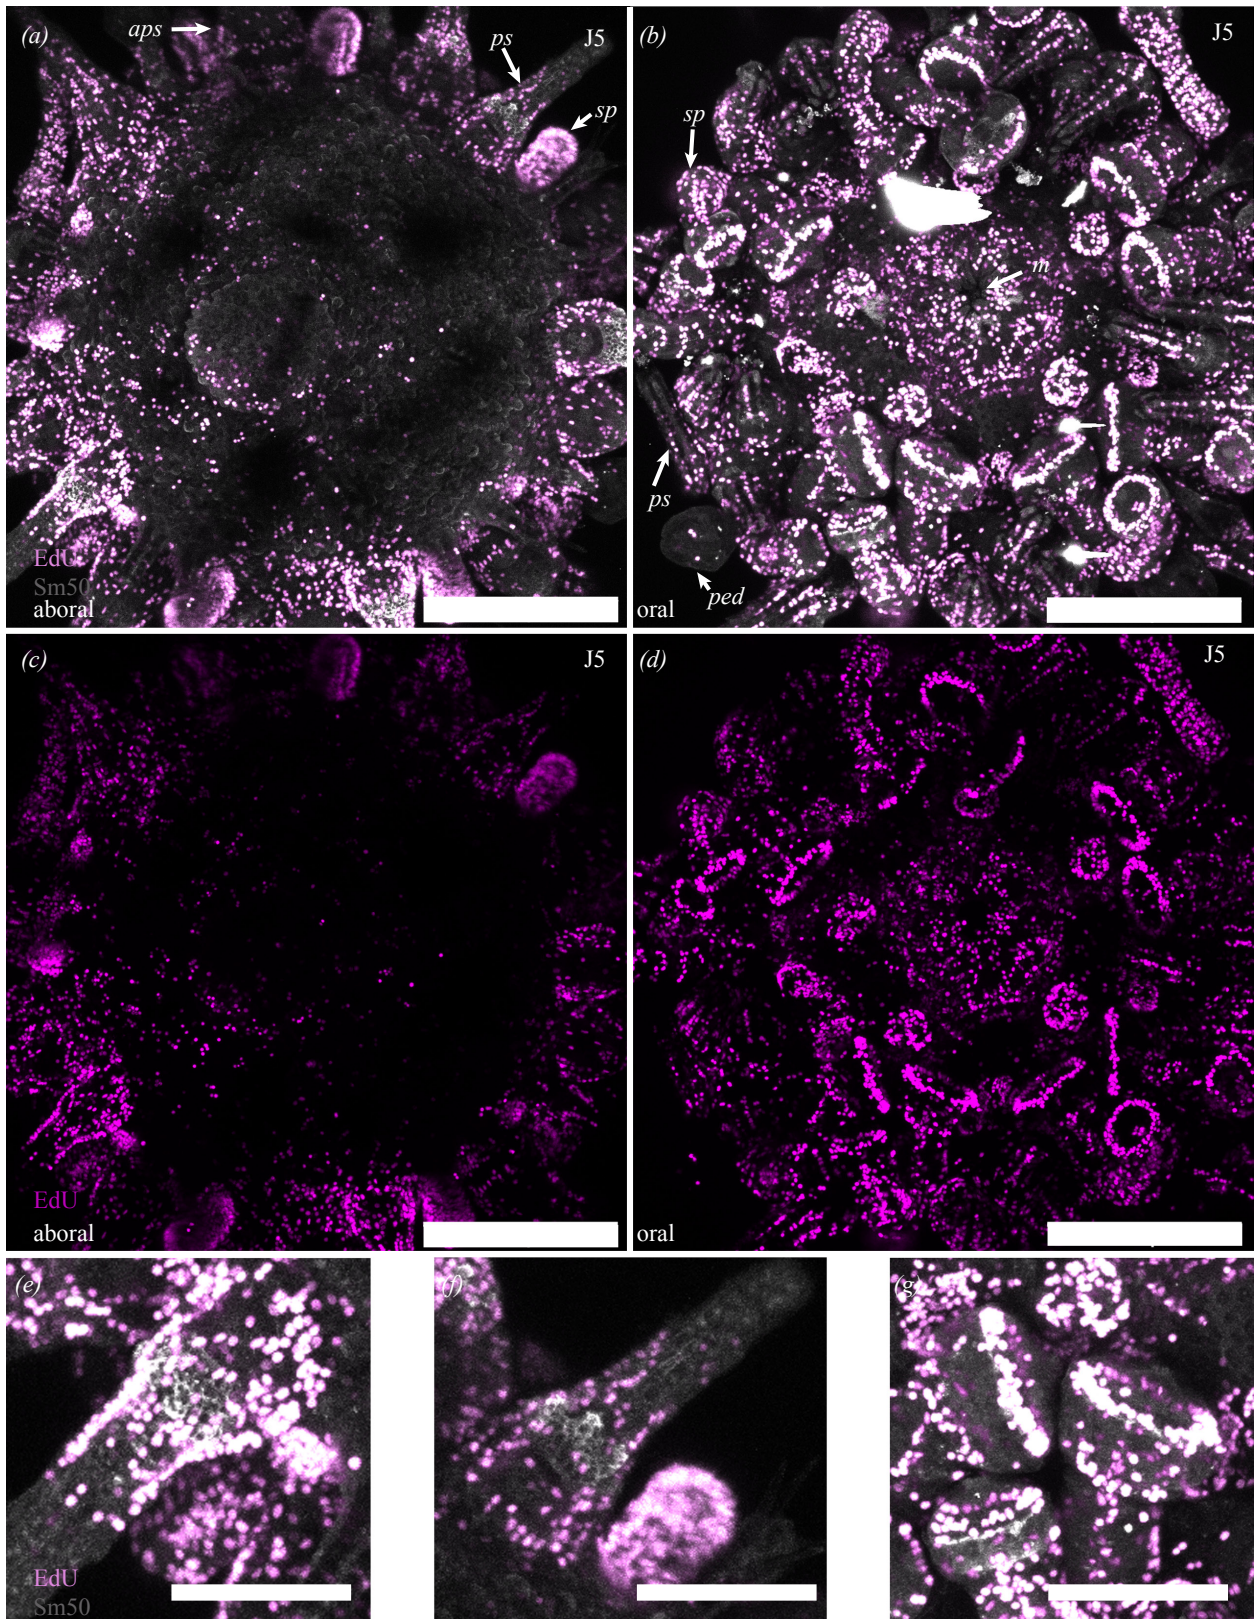

**Fig. S16. Cell proliferation in J5 Juvenile.** Incorporation of EdU into a 0 hours chase J5 individual after 63 hours of incubation with EdU, and staining for S530 using an anti-SM50 antibody. (a) Aboral surface of 0 hours chase animal showing localization of Sm50 relative to

proliferating cells marked by EdU (magenta-white). There is relatively little cell proliferation present in extraxial tissues on the aboral surface such as the genital and periproctal (anal) plates. Most cell proliferation seen from this view is associated with novel structures, such as newly added secondary podia and ambulacral spines. (b) Proliferating cells marked by EdU and localization of Sm50. Proliferation is extensive on the oral surface in axial tissues, especially when compared to the extraxial tissues of the aboral surface. High degrees of cell proliferation are found in the disks of the secondary podia, as well as in the peristomial podia and sphaeridia. Most proliferating cells on spines are located more proximally towards the base of the spine. (c) Magenta channel from (a), showing location of proliferating cells on aboral surface. (d) Magenta channel from (b), showing location of proliferating cells on oral surface. (e) Close up view of cell proliferation associated with growth of a newly added ambulacral primary spine. Most proliferating cells are localized towards the base of the spine and the tubercle. Strong staining of Sm50 is also located towards the base of the spine, though we interpret most distal growth takes place via skeletogenesis. (e) is the same as Figure 4i in the main text. (f) Cell proliferation associated with a growing primary spine and secondary podia. As in (e), most proliferating cells are located nearer to the base of the spine. High degrees of cell proliferation are associated with the growth of the secondary podia, as is also seen in J2 individuals in Figure 4b. (f) is the same as Figure 4j in the main text. (g) On the oral surface, high degrees of cell proliferation are associated with the tube feet. In particular, the margins of the tube feet disk show high degrees of cell proliferation, potentially associated with sensory motor neurons. ps, primary interambulacral spine; aps, ambulacral primary spine; sp, secondary podia; ped, pedicellariae; m, mouth. Scale bars in (a)-(d) are 200  $\mu\text{m}$ , scale bars in (e)-(g) are 100  $\mu\text{m}$ .

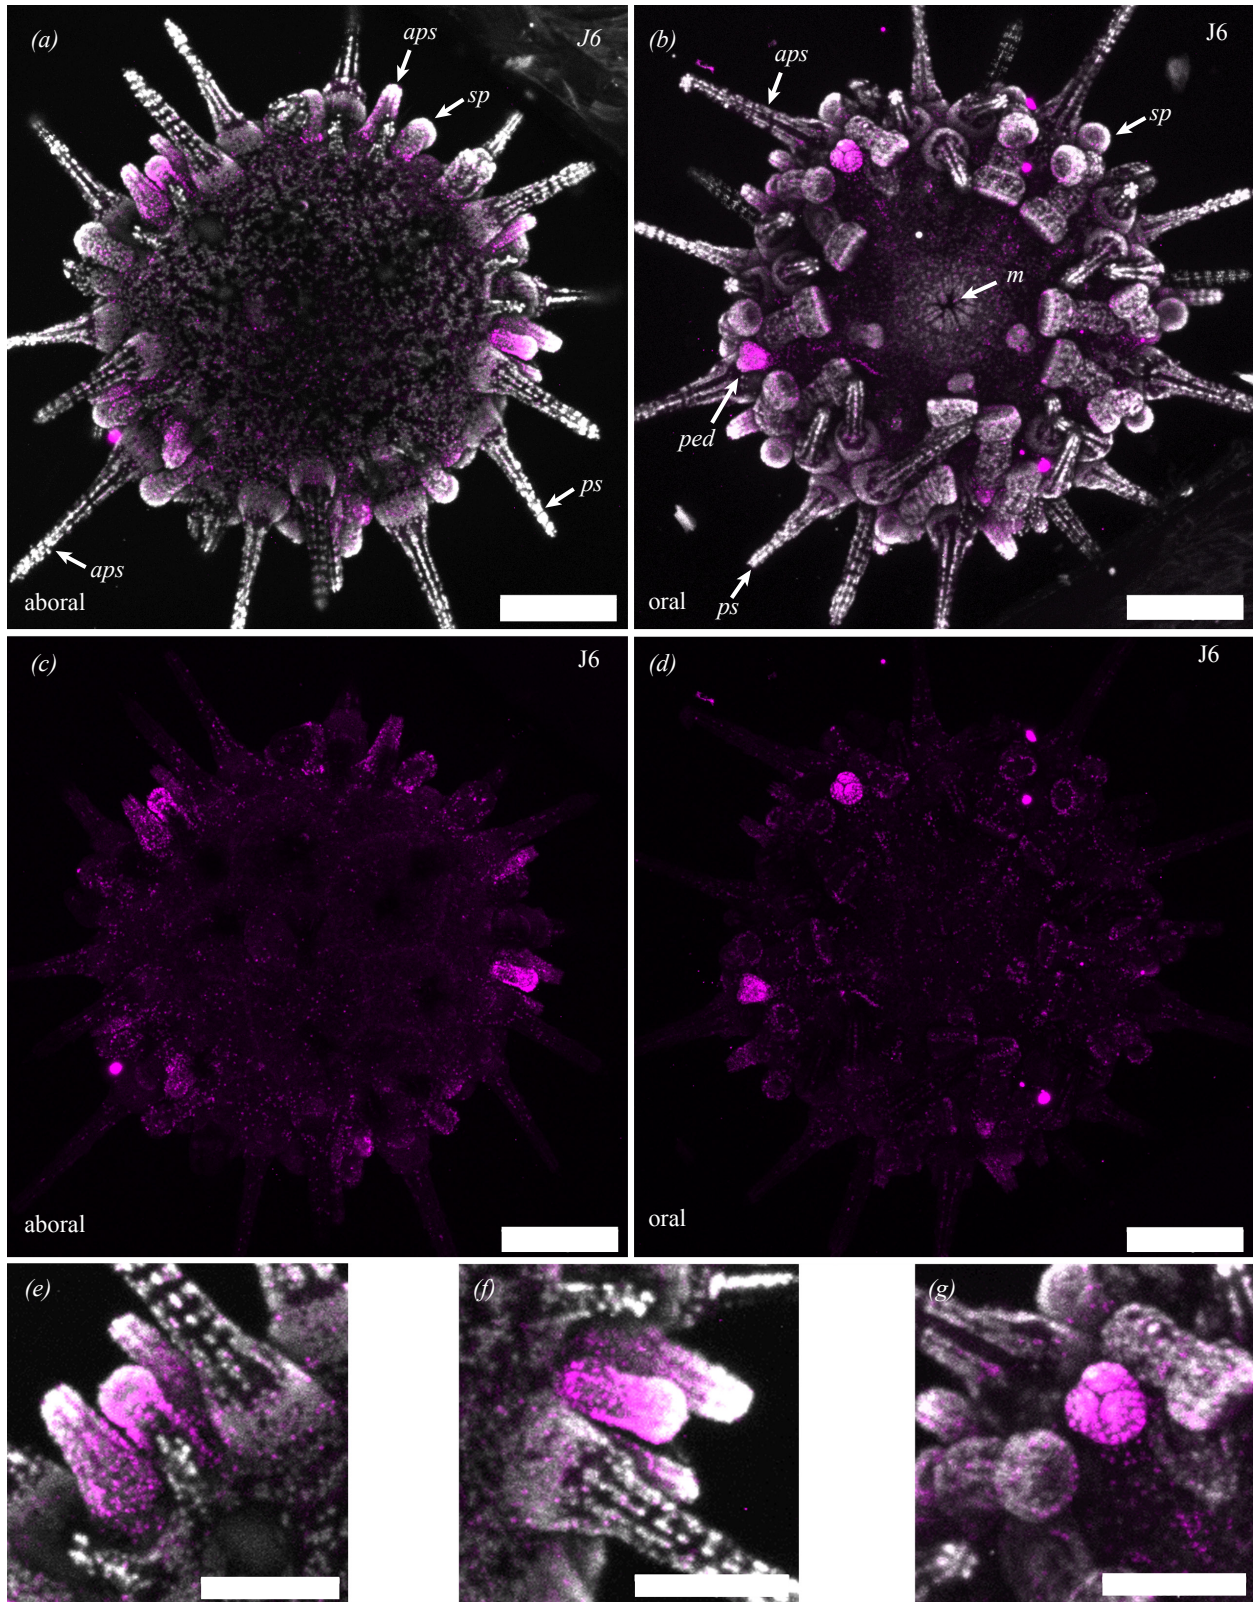

**Fig. S17. Cell proliferation in a J6 Juvenile.** Incorporation of EdU into a 48 hours chase growing J6 sea urchin after 63 hours of incubation with EdU. (a) EdU stained nuclei (magenta) relative to all cell nuclei marked with DAPI (gray) on the aboral surface. Note the low

abundance of proliferating cells on extraxial tissue (genital and anal plates). Most cell proliferation in this view is associated with the addition of new structures, such as ambulacral and interambulacral primary spines. (b) Cell proliferation marked using EdU on the oral surface of a J6 animal. High degrees of cell proliferation are associated with newly added pedicellariae. Proliferating cells are also found in the circular margins of the disks of the secondary podia. (c) Magenta channel of (a), showing location of cells marked with EdU. (d) Magenta channel of (b), showing EdU marked cells on oral surface. (e) Close up of newly added ambulacral and interambulacral spines, secondary podia, and associated cell proliferation. (f) Close up of proliferating cells in newly added secondary podia and spines. (g) Close up of ambulacral pedicellariae and associated cell proliferation. ps, primary interambulacral spine; aps, ambulacral primary spine; sp, secondary podia; ped, pedicellariae; m, mouth. Scale bars in (a)-(d) are 200  $\mu\text{m}$ , scale bars in (e)-(g) are 100  $\mu\text{m}$ .

### Supplemental Table Descriptions

Table S1. Antibodies and dilutions used in this study.

Table S2. Quantification of EdU+ nuclei relative to all nuclei labeled with DAPI

### Supplemental References

- [1] Gosselin, P. & Jangoux, M. 1998 From competent larva to exotrophic juvenile: a morphofunctional study of the perimetamorphic period of *Paracentrotus lividus* (Echinodermata, Echinoida). *Zoomorphology* **118**, 31-43.
- [2] Formery, L., Orange, F., Formery, A., Yaguchi, S., Lowe, C.J., Schubert, M. & Croce, J.C. Neural anatomy of echinoid early juveniles and comparison of nervous system organization in echinoderms. *Journal of Comparative Neurology*.
